# Supplementary material for: Oxidative addition/cycloaddition of arenesulfonamides and triflamide to N-allyltriflamide and N,N-diallyltriflamide
Source: Royal Society of Chemistry journal article supplement (doi:10.1039/c7ra05831d), 2017-01-01

## Supporting Information

### Oxidative Addition/Cycloaddition of Triflamide to N-Allyltriflamide and N,N-Diallyltriflamide

(RSC Advances)

*Bagrat A. Shainyan\**, *Vera V. Astakhova*, *Anton S. Ganin*, *Mikhail Yu. Moskalik*, *Irina V. Sterkhova*

Email: [bagrat@irioch.irk.ru](mailto:bagrat@irioch.irk.ru)

#### List of the contents

|                                                                                                               | Page |
|---------------------------------------------------------------------------------------------------------------|------|
| 1. General methods                                                                                            | 3    |
| 2. Synthetic procedures                                                                                       | 4-7  |
| 1. Synthesis of compound <b>6</b>                                                                             | 4    |
| 2. Synthesis of compound <b>7</b>                                                                             | 4    |
| 3. Synthesis of compounds <b>8-13</b>                                                                         | 5-8  |
| 3. Single crystal X-ray structure determinations                                                              | 9    |
| 4. Figure 1. Molecular structure of compound <b>7</b>                                                         | 10   |
| 5. Table 1. Crystal Data, Details of Intensity Measurements, and Structure Refinement for compound <b>7</b>   | 11   |
| 6. Table 2. Selected bond lengths, bond and torsion angles in compound <b>7</b>                               | 12   |
| 7. Figure 2. Molecular structure of compound <b>10</b>                                                        | 13   |
| 8. Table 3. Crystal Data, Details of Intensity Measurements, and Structure Refinement for compound <b>10</b>  | 14   |
| 9. Table 4. Selected bond lengths, bond and torsion angles in compound <b>10</b>                              | 15   |
| 10. Figure 3. Molecular structure of compound <b>11</b>                                                       | 16   |
| 11. Table 5. Crystal Data, Details of Intensity Measurements, and Structure Refinement for compound <b>11</b> | 17   |
| 12. Table 6. Selected bond lengths, bond and torsion angles in compound <b>11</b>                             | 18   |
| 13. Figure 4. <sup>1</sup> H NMR spectrum of compound <b>6</b>                                                | 19   |
| 14. Figure 5. <sup>13</sup> C NMR spectrum of compound <b>6</b>                                               | 20   |
| 15. Figure 6. <sup>19</sup> F NMR spectrum of compound <b>6</b>                                               | 21   |
| 16. Figure 7. FT-IR spectrum of compound <b>6</b>                                                             | 22   |
| 17. Figure 8. <sup>1</sup> H NMR spectrum of compound <b>7</b>                                                | 23   |

|     |                                                                          |    |
|-----|--------------------------------------------------------------------------|----|
| 18. | Figure 9. $^{13}\text{C}$ NMR spectrum of compound <b>7</b>              | 24 |
| 19. | Figure 10. $^{19}\text{F}$ NMR spectrum of compound <b>7</b>             | 25 |
| 20. | Figure 11. FT-IR spectrum of compound <b>7</b>                           | 26 |
| 21. | Figure 12. $^1\text{H}$ NMR spectrum of compound <b>8</b>                | 27 |
| 22. | Figure 13. $^{13}\text{C}$ NMR spectrum of compound <b>8</b>             | 28 |
| 23. | Figure 14. $^{19}\text{F}$ NMR spectrum of compound <b>8</b>             | 29 |
| 24. | Figure 15. FT-IR spectrum of compound <b>8</b>                           | 30 |
| 25. | Figure 16. $^1\text{H}$ NMR spectrum of compound <b>9</b>                | 31 |
| 26. | Figure 17. $^{13}\text{C}$ NMR spectrum of compound <b>9</b>             | 32 |
| 27. | Figure 18. $^{13}\text{C}$ NMR ( <i>J-modulation</i> ) spectrum <b>9</b> | 33 |
| 28. | Figure 19. $^{19}\text{F}$ NMR spectrum of compound <b>9</b>             | 34 |
| 29. | Figure 20. FT-IR spectrum of compound <b>9</b>                           | 35 |
| 30. | Figure 21. $^1\text{H}$ NMR spectrum of compound <b>10</b>               | 36 |
| 31. | Figure 22. $^{13}\text{C}$ NMR spectrum of compound <b>10</b>            | 37 |
| 32. | Figure 23. $^{19}\text{F}$ NMR spectrum of compound <b>10</b>            | 38 |
| 33. | Figure 24. FT-IR spectrum of compound <b>10</b>                          | 39 |
| 34. | Figure 25. $^1\text{H}$ NMR spectrum of compound <b>11</b>               | 40 |
| 35. | Figure 26. $^{13}\text{C}$ NMR spectrum of compound <b>11</b>            | 41 |
| 36. | Figure 27. $^{19}\text{F}$ NMR spectrum of compound <b>11</b>            | 42 |
| 37. | Figure 28. FT-IR spectrum of compound <b>11</b>                          | 43 |

**General methods:**

IR spectra were taken on Varian 3100 FT-IR and Bruker Vertex 70 spectrophotometers in KBr. NMR spectra were registered on a Bruker DPX-400 spectrometer with working frequencies 400 ( $^1\text{H}$ ), 100 ( $^{13}\text{C}$ ) and 376 MHz ( $^{19}\text{F}$ ) in  $\text{CD}_3\text{CN}$  or  $\text{CDCl}_3$ , chemical shifts are given with respect to TMS ( $^1\text{H}$ ,  $^{13}\text{C}$ ) and  $\text{CCl}_3\text{F}$  ( $^{19}\text{F}$ ). Elemental analysis was performed on a CHN-analyzer Thermo-Finnigan Flash EA (Milan, Italy). The reactions were monitored by TLC on silica plates 60 F-254, eluents – hexane:ether = 1:1 or hexane:ether:acetone = 2:3:1. The reaction products were separated by column chromatography using coarse (Alfa Aesar 0.060-0.200 mm) or fine silica (Fluka 0.04-0.063 mm). Melting points were determined on a Boetius apparatus (VEB Analytik).

## Synthetic procedures:

### 1. Synthesis of compounds **6**

#### *N,N',N''*-Propane-1,2,3-triyltris(triflamide):

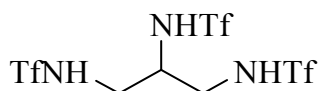

To 1.20 g (8 mmol) of trifluoromethanesulfonamide and 3.61 g (24 mmol) of NaI 80 ml of CH<sub>3</sub>CN was added. To this solution, 1.10 ml (8 mmol) of N-allyltriflamide was added, the mixture was cooled to -30°C, and 2.75 ml (24 mmol) of *t*-BuOCl was added dropwise. The reaction was carried out during 24 h in argon atmosphere in the dark. After completion, the solvent was removed under reduced pressure, the residue dissolved in 80 ml of diethyl ether, treated with 80 ml of aqueous Na<sub>2</sub>S<sub>2</sub>O<sub>3</sub>, the extract dried over CaCl<sub>2</sub>. The solvent was removed in vacuum, dark-brown residue (~2.0 g) placed in a column with coarse silica and eluted with hexane to separate tarry admixtures, then with hexane–ether =1:1 and pure ether to afford (1.93 g 100%) of product **5**, a white powder, m. p. 186°C. IR (KBr, v/cm<sup>-1</sup>): br. 3319, 1457, 1382, 1233, 1196, 1145, 1080, 1005, 950, 879, 817, 610, 511, 453. <sup>1</sup>H NMR (CD<sub>3</sub>CN) δ: 7.01 br.s. (3H, NH), 3.73 m (CH), 3.46 d.d. (2H, CH<sub>2</sub>, *J* 14.8, 4.8 Hz), 3.34 d.d. (2H, CH<sub>2</sub>, *J* 14.6, 7.3 Hz). <sup>13</sup>C NMR (CD<sub>3</sub>CN) δ: 120.4 (q, 2CF<sub>3</sub>, *J* 320.8 Hz), 120.2 (q, CF<sub>3</sub>, *J* 320.0 Hz), 56.7 (CH), 45.7 (2CH<sub>2</sub>). <sup>19</sup>F NMR (CD<sub>3</sub>CN) δ<sub>F</sub>: -77.5 (2CF<sub>3</sub>), -77.7 (CF<sub>3</sub>). Found (%): C, 15.11; H, 1.95; N, 8.39; S 19.69; F 35.20. Calc. for C<sub>6</sub>H<sub>8</sub>F<sub>9</sub>N<sub>3</sub>O<sub>6</sub>S<sub>3</sub> (%): C, 14.85; H, 1.66; N, 8.66; S 19.82; F 35.23.

### 2. Synthesis of compounds **7**

#### 2,5-Bis(chloromethyl)-1,4-bis[(trifluoromethyl)sulfonyl]piperazine (**7**):

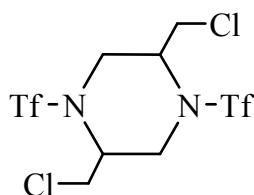

To 8 mmol of arenesulfonamide **3a–d** or trifluoroacetamide **4** and 3.57 g (24 mmol) of NaI 80 ml of CH<sub>3</sub>CN was added. To this solution, 1.10 ml (8 mmol) of N-allyltriflamide was added, the mixture was cooled to -30°C, and 2.72 ml (24 mmol) of *t*-BuOCl was added dropwise. The reaction was carried out during 24 h in argon atmosphere in the dark. After completion, the solvent was removed under reduced pressure, the residue dissolved in 80 ml of diethyl ether, treated with 80 ml of aqueous Na<sub>2</sub>S<sub>2</sub>O<sub>3</sub>, the extract dried over CaCl<sub>2</sub>. The solvent was removed in vacuum, dark-brown residue (~2.63 g) placed in a column with coarse silica and eluted with hexane, then with hexane–ether = 1:1 and pure ether. From ethereal extract unreacted

arenesulfonamide or trifluoroacetamide was recovered. From hexane extract product **7** was obtained. White powder, m. p. 188°C. IR (KBr,  $\nu/\text{cm}^{-1}$ ): 2982, 2262, 1454, 1389, 1333, 1293, 1231, 1193, 1143, 1101, 1054, 1005, 941, 857, 807, 758, 652, 585, 493.  $^1\text{H}$  NMR ( $\text{CD}_3\text{CN}$ )  $\delta$ : 4.31-4.19 m (2CH), 4.02 d (2H,  $\text{CHH}^A$ ,  $J$  14.9 Hz), 3.88 d.d (2H,  $\text{CH}_2\text{Cl}$ ,  $J$  11.4, 9.6 Hz), 3.74 d.d (2H,  $\text{CH}_2\text{Cl}$ ,  $J$  11.7, 5.9 Hz), 3.65 d.d (2H,  $\text{CHH}^B$ ,  $J$  14.9, 3.6 Hz).  $^{13}\text{C}$  NMR ( $\text{CD}_3\text{CN}$ )  $\delta$ : 120.1 (q,  $\text{CF}_3$ ,  $J$  321.2 Hz), 55.0 (2CH), 43.0 (2 $\text{CH}_2\text{Cl}$ ), 40.4 (2 $\text{CH}_2$ ).  $^{19}\text{F}$  NMR ( $\text{CD}_3\text{CN}$ )  $\delta_{\text{F}}$ : -76.0. Mass spectrum,  $m/z$  ( $I_{\text{rel}}$ , %): 446 (0.3) [ $M$ ] $^+$ , 397 (100) [ $M-\text{CH}_2\text{Cl}$ ] $^+$ , 313 (3.9) [ $M-\text{CF}_3\text{SO}_2$ ] $^+$ , 263 (84.6) [ $M-\text{CH}_2\text{Cl}-\text{CF}_3\text{SO}_2$ ] $^+$ , 131 (26.1) [ $264-\text{CF}_3\text{SO}_2$ ] $^+$ , 95 (36.7) [ $131-\text{HCl}$ ] $^+$ , 90 (33.3) [ $131-\text{C}_3\text{H}_5$ ] $^+$ , 69 (54.5) [ $\text{CF}_3$ ]. Found (%): C, 21.43; H, 2.10; N, 6.02; Cl 15.86%. Calc. for  $\text{C}_8\text{H}_{10}\text{Cl}_2\text{F}_6\text{N}_2\text{O}_4\text{S}_2$  (%): C, 21.49; H, 2.25; N, 6.26; Cl 15.86%.

### 3. Synthesis of compounds **8–11**

1,1,1-Trifluoro-*N*-(2-iodo-3-[[trifluoromethyl]sulfonyl]amino)propyl)-*N*-prop-2-en-1-ylmethanesulfonamide (**8**):

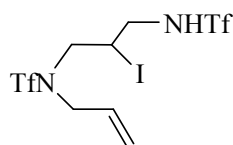

1,1,1-Trifluoro-*N,N*-bis(2-iodo-3-[[trifluoromethyl]sulfonyl]amino)propyl)methanesulfonamide (**9**):

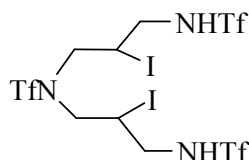

3,7-Diiodo-1,5-bis[[trifluoromethyl]sulfonyl]-1,5-diazocane (**10**):

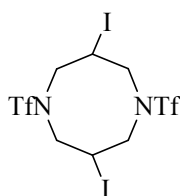

3,7,9-Tris[[trifluoromethyl]sulfonyl]-3,7,9-triazabicyclo[3.3.1]nonane (**11**):

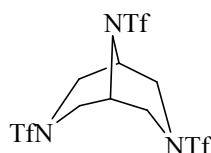

To 3.87 g (26 mmol) of trifluoromethanesulfonamide and 11.69 g (39 mmol) of NaI 80 ml of  $\text{CH}_3\text{CN}$  was added. To this solution, 2.35 ml (13 mmol) of *N,N*-diallyltriflamide was added, the mixture cooled to  $-30^\circ\text{C}$  and 8.86 ml (78 mmol) of *t*-BuOCl was added dropwise. The reaction was carried out during 24 h in argon atmosphere in the dark. Then, the solvent was removed at a

reduced pressure, the residue dissolved in 80 ml of diethyl ether and treated with 80 ml of aqueous Na<sub>2</sub>S<sub>2</sub>O<sub>3</sub>. The extract was dried over CaCl<sub>2</sub>, the solvent removed in vacuum, dark-red residue (~3.5 g) washed with chloroform (3×15 ml) to obtain ~2.0 g of viscous liquid residue and ~1.5 g of crystalline residue, which was crystallized from minimal amount of chloroform. The precipitated crystals were filtered and dried to give 0.40 g (9%) of product **11** as colorless crystals with m.p. 283°C. From the filtrate, the solvent was removed in vacuum, the crystalline residue washed with ether to give 0.85 g (16%) of product **10** as a white powder, m.p. 253°C. The remained viscous liquid (~2.0 g) was dissolved in hot hexane and cooled to give two layers: ~1.1 g of brown viscous layer and 0.9 g of transparent liquid of purple color. Viscous brown fraction was purified on a column with coarse silica with hexane and hexane–methylene chloride = 3:1 as eluents to obtain 0.91 g (21%) of product **8**, light-brown liquid. Similarly, the second purple fraction was purified on a column with coarse silica with the same eluents to obtain 0.59 g (9%) of product **9** as a colorless liquid.

**1,1,1-Trifluoro-*N*-(2-iodo-3-[(trifluoromethyl)sulfonyl]amino)propyl)-*N*-prop-2-en-1-ylmethanesulfonamide (8).** IR (KBr,  $\nu/\text{cm}^{-1}$ ): br. 3300, 2936, 1646, 1432, 1391, 1324, 1280, 1224, 1192, 1133, 1051, 990, 937, 914, 862, 787, 745, 708, 649, 594, 499. <sup>1</sup>H NMR (CDCl<sub>3</sub>)  $\delta$ : 5.90–5.77 m (1H, CH=CH<sub>2</sub>), 5.47–5.38 m (2H, CH=CH<sub>2</sub>), 4.54–4.45 m (1H, CHI), 4.20 d.d (1H, NCH<sup>*B*</sup>CHI, *J* 15.4, 6.7 Hz), 4.09–3.94 m (2H, NHCH<sub>2</sub>CHI), 3.90–3.81 m (2H, CH<sub>2</sub>CH=CH<sub>2</sub>), 3.70 d.d (1H, NCH<sup>*A*</sup>CHI, *J* 15.4, 7.6 Hz). <sup>13</sup>C NMR (CDCl<sub>3</sub>)  $\delta$ : 119.9 (q, CF<sub>3</sub>, *J* 323.3 Hz), 130.6 (CH), 122.2 (CH<sub>2</sub>), 52.7 (CH<sub>2</sub>CHI), 52.4 (CH<sub>2</sub>CHCH<sub>2</sub>), 47.7 (CH<sub>2</sub>NH), 26.0 (CHI). <sup>19</sup>F NMR (CDCl<sub>3</sub>)  $\delta_{\text{F}}$ : –75.2. Found (%): C, 19.57; H, 2.70; N, 5.15; S 12.23; F 22.15; I 24.60. Calc. for C<sub>8</sub>H<sub>11</sub>F<sub>6</sub>IN<sub>2</sub>O<sub>4</sub>S<sub>2</sub> (%): C, 19.06; H, 2.20; N, 5.56; S 12.72; F 22.61; I 25.17.

**1,1,1-Trifluoro-*N,N*-bis(2-iodo-3-[(trifluoromethyl)sulfonyl]amino)propyl)methanesulfonamide (9).** IR (KBr,  $\nu/\text{cm}^{-1}$ ): br. 3301, 2950, 2858, 1435, 1392, 1324, 1264, 1222, 1196, 1131, 1058, 982, 916, 857, 784, 740, 706, 599, 497. <sup>1</sup>H NMR (CDCl<sub>3</sub>)  $\delta$ : 4.63–4.55 m (2H, CHI, first diastereoisomer), 4.54–4.44 m (2H, CHI, second diastereoisomer), 4.18–4.08 m (4H, NHCH<sub>2</sub>CHI, first diastereomer), 4.05–3.95 (4H, NHCH<sub>2</sub>CHI, second diastereomer), 3.92–3.73 (8H, NCH<sub>2</sub>CHI in the two diastereomers). <sup>13</sup>C NMR (CDCl<sub>3</sub>)  $\delta$ : 119.6 (q, CF<sub>3</sub>, *J* 323.4 Hz), 119.5 (q, CF<sub>3</sub>, *J* 323.4 Hz), 56.0 (CH<sub>2</sub>N), 55.7 (CH<sub>2</sub>N), 47.8 (CH<sub>2</sub>NH), 25.7 (CHI), 25.5 (CHI). <sup>19</sup>F NMR (CDCl<sub>3</sub>)  $\delta_{\text{F}}$ : –74.1. Found (%): C, 14.28; H, 1.34; N, 4.90; S 11.84; F 21.38; I 33.12. Calc. for C<sub>9</sub>H<sub>12</sub>F<sub>9</sub>I<sub>2</sub>N<sub>3</sub>O<sub>6</sub>S<sub>3</sub> (%): C, 13.87; H, 1.55; N, 5.39; S 12.35; F 21.94; I 32.57.

**3,7-Diiodo-1,5-bis[(trifluoromethyl)sulfonyl]-1,5-diazocane (10).** IR (KBr,  $\nu/\text{cm}^{-1}$ ): 1631, 1456, 1395, 1307, 1221, 1197, 1130, 1001, 862, 801, 777, 734, 661, 591, 496, 423. <sup>1</sup>H NMR (CD<sub>3</sub>CN)  $\delta$ : 4.57 m (2H, CHI), 4.27 d (4H, CH<sub>2</sub>N, *J* 15.4 Hz), 3.85 d (2H, CH<sub>2</sub>N, *J* 15.7 Hz), 3.82 d (2H, CH<sub>2</sub>N, *J* 15.7 Hz). <sup>13</sup>C NMR (CD<sub>3</sub>CN)  $\delta$ : 117.8 (q, CF<sub>3</sub>, *J* 324.0 Hz), 60.7 (CH<sub>2</sub>N),

25.2 (CHI).  $^{19}\text{F}$  NMR ( $\text{CDCl}_3$ )  $\delta_{\text{F}}$ : -73.7. Mass spectrum,  $m/z$  ( $I_{\text{rel}}$ , %): 630 (0.2)  $[\text{M}]^+$ , 503 (50)  $[\text{M}-\text{I}]^+$ , 375 (12)  $[\text{503}-\text{HI}]^+$ , 243 (42)  $[\text{503}-\text{HI}-\text{CF}_3\text{SO}_2]^+$ , 69 (62)  $[\text{CF}_3]^+$ , 41 (100)  $[\text{CH}_2\text{CHCH}_2]^+$ . Found (%): C, 15.70; H, 1.48; N, 4.48; S 10.58; F 18.35; I 40.04. Calc. for  $\text{C}_8\text{H}_{10}\text{F}_6\text{I}_2\text{N}_2\text{O}_4\text{S}_2$  (%): C, 15.25; H, 1.60; N, 4.45; S 10.18; F 18.09; I 40.28.

**3,7,9-Tris[(trifluoromethyl)sulfonyl]-3,7,9-triazabicyclo[3.3.1]nonane (11).** IR (KBr,  $\nu/\text{cm}^{-1}$ ): 1641, 1401, 1336, 1235, 1189, 1119, 1099, 1054, 990, 947, 909, 770, 734, 666, 590, 462.  $^1\text{H}$  NMR ( $\text{CD}_3\text{CN}$ )  $\delta$ : 4.32 m (2H, CHI), 4.13 d (4H,  $\text{CH}_2\text{N}$ ,  $J$  13.2 Hz), 3.61 d (4H,  $\text{CH}_2\text{N}$ ,  $J$  13.0 Hz).  $^{13}\text{C}$  NMR ( $\text{CD}_3\text{CN}$ )  $\delta$ : 119.0 (q,  $\text{CF}_3$ ,  $J$  323.2 Hz), 118.4 (q,  $\text{CF}_3$ ,  $J$  320.2 Hz), 49.8 (CHN), 49.3 (CHN), 30.6 ( $\text{CH}_2\text{N}$ ).  $^{19}\text{F}$  NMR ( $\text{CDCl}_3$ )  $\delta_{\text{F}}$ : -75.3 ( $\text{CF}_3\text{NCH}$ ), -78.3 ( $\text{CF}_3\text{NCH}_2$ ). Mass spectrum,  $m/z$  ( $I_{\text{rel}}$ , %): 523 (2)  $[\text{M}]^+$ , 390 (64)  $[\text{M}-\text{CF}_3\text{SO}_2]^+$ , 257 (55)  $[\text{390}-\text{CF}_3\text{SO}_2]^+$ , 124 (95)  $[\text{257}-\text{CF}_3\text{SO}_2]^+$ , 95 (92)  $[\text{124}-\text{CH}_2\text{N}]^+$ , 69 (100)  $[\text{CF}_3]^+$ , 42 (86)  $[\text{C}_3\text{H}_6]^+$ . Found (%): C, 20.98; H, 1.80; N, 7.81; S 17.95; F 32.19. Calc. for  $\text{C}_9\text{H}_{10}\text{F}_9\text{N}_3\text{O}_6\text{S}_3$  (%): C, 20.65; H, 1.93; N, 8.03; S 18.38; F 32.67.

#### Reactions of *N,N*-diallyltriflamide **1** with arenesulfonamides **3a-d** and trifluoroacetamide **4**.

To the solution of 7 mmol of arenesulfonamide **3** or trifluoroacetamide **4** and 20 mmol of NaI 50 ml of MeCN was added. To this solution, 7 mmol of compound **1** was added, the mixture was cooled to  $-30^\circ\text{C}$  and 2.24 ml (20 mmol) of *t*-BuOCl was added dropwise. The mixture was stirred for 24 h in argon atmosphere in the dark. After completion, the solvent was removed at a reduced pressure, the residue dissolved in 50 ml of ethyl acetate, treated with 50 ml of aqueous  $\text{Na}_2\text{S}_2\text{O}_3$ , the extract dried over  $\text{CaCl}_2$ . The solvent was removed, the residue separated by column chromatography on silica by successive elution with hexane, hexane-ether 1:1, ether. From ethereal fraction the unreacted sulfonamide **3** or amide **4** was isolated, the product was further purified by column chromatography on fine silica with hexane and ether as eluents.

**N-(2-iodo-3-{prop-2-en-1-yl}[(triflamido)propyl])tosylamide 12a.** IR (KBr,  $\nu/\text{cm}^{-1}$ ): 3281, 2928, 1650, 1599, 1438, 1389, 1331, 1224, 1192, 1161, 1137, 1092, 1045, 937, 815, 785, 749, 708, 665, 592, 553, 498.  $^1\text{H}$  NMR ( $\text{CDCl}_3$ )  $\delta$ : 2.48 s (3H,  $\text{CH}_3$ ), 3.76-3.65 m (2H,  $\text{CH}_2\text{CH}=\text{CH}_2$ ), 3.89-3.82 m (2H,  $\text{NHCH}^A\text{HCHI}$ ), 4.20 dd (2H,  $\text{NCHH}^B\text{CHI}$ ,  $J$  15.8, 6.4 Hz), 4.55-4.44 m (1H, CHI), 4.95 s (1H, NH), 5.47-5.37 m (2H,  $\text{CH}=\text{CH}_2$ ), 5.92-5.71 m (1H,  $\text{CH}=\text{CH}_2$ ), 7.39-7.34 m (2H,  $\text{CH}^{3,5}$ ,  $J$  17.0, 8.5, 0.42 Hz), 7.75 dd (2H,  $\text{CH}^{2,6}$ ,  $J$  6.7, 1.5 Hz), 7.83 dd (2H,  $\text{CH}^{2,6}$ ,  $J$  8.3, 3.0 Hz).  $^{13}\text{C}$  NMR ( $\text{CDCl}_3$ ),  $\delta_{\text{C}}$ : 21.6 (CHI), 21.6 ( $\text{CH}_3$ ), 47.9 ( $\text{CH}_2\text{N}$ ), 52.1 ( $\text{CH}_2\text{CHCH}_2$ ), 52.5 ( $\text{CH}_2\text{CHI}$ ), 122.6 ( $=\text{CH}_2$ ), 126.5 q ( $\text{CF}_3$ ,  $J$  328.1 Hz), 127.1 ( $\text{C}^o$ ), 130.1 ( $\text{C}^m$ ), 130.6 ( $\text{CH}=\text{}$ ), 136.5 ( $\text{C}^i$ ), 144.2 ( $\text{C}^p$ ).  $^{19}\text{F}$  NMR ( $\text{CDCl}_3$ )  $\delta_{\text{F}}$ : -75.0. Found (%): C, 31.70; H, 3.38; N, 4.92; S 11.63; F 10.48; I 23.49. Calc. for  $\text{C}_{14}\text{H}_{18}\text{F}_3\text{IN}_2\text{O}_4\text{S}_2$  (%): C, 31.95; H, 3.45; N, 5.32; S 12.18; F 10.83; I 24.11.

**N-[3-(N-allyltriflamido)-2-iodopropyl]benzenesulfonamide 12b.** IR (KBr,  $\nu/\text{cm}^{-1}$ ): 3330, 3081, 2930, 2858, 2611, 1972, 1894, 1730, 1646, 1443, 1391, 1331, 1290, 1224, 1190, 1135, 1050, 991, 937, 915, 862, 788, 740, 695, 594, 500.  $^1\text{H}$  NMR,  $\delta$ : 3.70 dd (1H,  $\text{NCH}^A\text{CHI}$ ,  $J$  14.6, 7.5 Hz), 3.85 dd (2H,  $\text{CH}_2\text{CH}=\text{CH}_2$ ,  $J$  11.0, 7.3 Hz), 4.11-3.92 m (2H,  $\text{NHCH}_2\text{CHI}$ ), 4.19 dd (1H,  $\text{NCH}^B\text{CHI}$ ,  $J$  15.4, 6.0 Hz), 4.56–4.38 m (1H,  $\text{CHI}$ ), 5.47–5.38 m (2H,  $=\text{CH}_2$ ), 5.90–5.70 m (1H,  $\text{CH}=\text{}$ ), 7.66-7.43 m (2H,  $\text{CH}^{3,5}$ ), 7.77-7.66 m (1H,  $\text{CH}^4$ ), 8.01-7.81 m (2H,  $\text{CH}^{2,6}$ ).  $^{13}\text{C}$  NMR,  $\delta_{\text{C}}$ : 26.0 ( $\text{CHI}$ ), 47.6 ( $\text{CH}_2\text{NH}$ ), 52.3 ( $\text{CH}_2\text{CHCH}_2$ ), 52.6 ( $\text{CH}_2\text{CHI}$ ), 119.7 q ( $\text{CF}_3$ ,  $J$  323.0 Hz), 122.3 ( $=\text{CH}_2$ ), 127.6 ( $\text{C}^o$ ), 129.2 ( $\text{C}^m$ ), 129.4 ( $\text{C}^p$ ), 130.6 ( $\text{CH}=\text{}$ ), 133.2 ( $\text{C}^i$ ).  $^{19}\text{F}$  NMR,  $\delta_{\text{F}}$ : –75.1. Found (%): C, 29.96; H, 3.02; N, 5.43; S 12.46; F 11.10; I 24.30. Calc. for  $\text{C}_{13}\text{H}_{16}\text{F}_3\text{I}\text{N}_2\text{O}_4\text{S}_2$  (%): C, 30.48; H, 3.15; N, 5.47; S 12.52; F 11.13; I 24.77.

**N-Allyl-N-(3-chloro-2-iodopropyl)triflamide 13.** IR (KBr,  $\nu/\text{cm}^{-1}$ ): 3086, 2987, 2943, 2881, 1646, 1431, 1390, 1280, 1222, 1190, 1134, 1050, 990, 936, 915, 862, 787, 746, 708, 594, 499.  $^1\text{H}$  NMR,  $\delta$ : 3.69 dd (1H,  $\text{NCH}^A\text{CHI}$ ,  $J$  15.1, 8.0 Hz), 3.83 dd (2H,  $\text{CH}_2\text{CH}=\text{CH}_2$ ,  $J$  12.0, 7.0 Hz), 4.07-3.90 m (2H,  $\text{ClCH}_2\text{CHI}$ ), 4.17 dd (1H,  $\text{NCH}^B\text{CHI}$ ,  $J$  15.7, 6.5 Hz), 4.52-4.41 m (1H,  $\text{CHI}$ ), 5.45-5.35 m (2H,  $=\text{CH}_2$ ), 5.88-5.73 m (1H,  $\text{CH}=\text{}$ ).  $^{13}\text{C}$  NMR,  $\delta_{\text{C}}$ : 26.3 ( $\text{CHI}$ ), 48.0 ( $\text{CH}_2\text{Cl}$ ), 52.6 ( $\text{CH}_2\text{CHCH}_2$ ), 53.0 ( $\text{CH}_2\text{CHI}$ ), 120.0 q ( $\text{CF}_3$ ,  $J$  323.4 Hz), 122.4 ( $=\text{CH}_2$ ), 130.9 ( $\text{CH}=\text{}$ ).  $^{19}\text{F}$  NMR,  $\delta_{\text{F}}$ : –75.2. Found (%): C, 21.46; H, 2.57; N, 3.58; S 8.20; F 13.93; I 32.11; Cl 8.93. Calc. for  $\text{C}_7\text{H}_{10}\text{ClF}_3\text{INO}_2\text{S}$  (%): C, 21.47; H, 2.57; N, 3.58; S 8.19; F 14.56; I 32.41; Cl 9.05.

**N-[3-(N-Allyltriflamido)-2-iodopropyl]trifluoroacetamide 12e.** IR (KBr,  $\nu/\text{cm}^{-1}$ ): 3384, 3325, 3094, 2937, 1718, 1648, 1552, 1439, 1389, 1220, 1189, 1138, 1034, 995, 939, 909, 788, 729, 592, 503.  $^1\text{H}$  NMR,  $\delta_{\text{H}}$ : 3.76-3.50 m (2H,  $\text{CH}_2\text{CH}=\text{CH}_2$ ), 4.01-3.76 m (2H,  $\text{NCH}^A\text{HCHI}$ ), 4.19-4.01 m (2H,  $\text{NHCH}^B\text{CHI}$ ), 4.45-4.30 m (1H,  $\text{CHI}$ ), 5.48–5.31 m (2H,  $=\text{CH}_2$ ), 5.92-5.67 m (1H,  $\text{CH}=\text{}$ ), 7.20 t (1H,  $\text{NH}$ ,  $J$  5.7 Hz).  $^{13}\text{C}$  NMR,  $\delta_{\text{C}}$ : 23.8 ( $\text{CHI}$ ), 44.1 ( $\text{CH}_2\text{NH}$ ), 52.4 ( $\text{CH}_2\text{CHCH}_2$ ), 53.0 ( $\text{CH}_2\text{CHI}$ ), 115.8 q ( $\text{CF}_3$ ,  $J$  287.3 Hz), 119.8 q ( $\text{CF}_3$ ,  $J$  322.1 Hz), 122.1 ( $=\text{CH}_2$ ), 130.8 ( $\text{CH}=\text{}$ ), 157.8 q ( $\text{C}=\text{O}$ ,  $J$  37.6 Hz).  $^{19}\text{F}$  NMR,  $\delta_{\text{F}}$ : –75.8. Found (%): C, 22.99; H, 2.30; N, 5.58; S 6.47; F 24.20; I 26.74. Calc. for  $\text{C}_9\text{H}_{11}\text{F}_6\text{I}\text{N}_2\text{O}_3\text{S}$  (%): C, 23.09; H, 2.37; N, 5.98; S 6.85; F 24.35; I 27.11.



### **Single crystal X-ray structure determinations:**

The single crystals of **7** were obtained by slow vaporization from acetonitrile, **10** from chloroform, **11** from diethyl ether. Crystal data were collected on a Bruker D8 Venture diffractometer with MoK $\alpha$  radiation ( $\lambda = 0.71073$ ) using the  $\varphi$  and  $\omega$  scans. The structures were solved and refined by direct methods using the SHELX programs set [1]. Data were corrected for absorption effects using the multi-scan method (SADABS). Nonhydrogen atoms were refined anisotropically using SHELX programs set [1]. **CCDC 1545539 (7)** , **CCDC 1520698 (10)** and **CCDC 1520697 (11)** contain the supplementary crystallographic data for this paper. These data can be obtained free of charge from the Cambridge Crystallographic Data Centre via [www.ccdc.cam.ac.uk/data\\_request/cif](http://www.ccdc.cam.ac.uk/data_request/cif).

### **References:**

[1] G.M. Sheldrick, Acta Crystallogr. A64 (2008) 112.

Figure 1. Molecular structure of compound 7

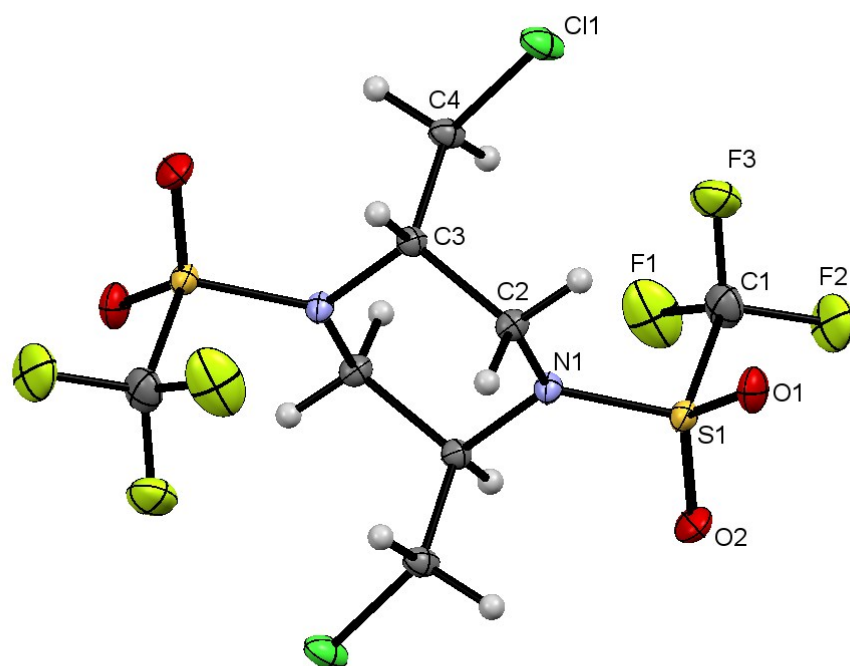

**Table 1.** Crystal Data, Details of Intensity Measurements, and Structure Refinement for compound **7**

|                                                 |                                                                               |
|-------------------------------------------------|-------------------------------------------------------------------------------|
| Empirical formula                               | C <sub>4</sub> H <sub>5</sub> ClF <sub>3</sub> NO <sub>2</sub> S              |
| Formula weight / g·mol <sup>-1</sup>            | 223.60                                                                        |
| Crystal system                                  | Monoclinic                                                                    |
| Space group                                     | P 21/c                                                                        |
| <i>a</i> / Å                                    | 8.8090(4)                                                                     |
| <i>b</i> / Å                                    | 12.7998(6)                                                                    |
| <i>c</i> / Å                                    | 7.2200(3)                                                                     |
| $\beta$ / °                                     | 91.795(2)                                                                     |
| Volume / Å <sup>3</sup>                         | 813.68(6)                                                                     |
| <i>Z</i>                                        | 4                                                                             |
| Density (calculated) / g·cm <sup>-3</sup>       | 1.825                                                                         |
| Absorptions coefficient / mm <sup>-1</sup>      | 0.737                                                                         |
| Radiation ( $\lambda$ / Å)                      | MoK $\alpha$ (0.71073)                                                        |
| Temperature / K                                 | 100(2)                                                                        |
| 2 $\theta$ range / °                            | 5.62 – 60.10                                                                  |
| Crystal size / mm                               | 0.180 × 0.350 × 0.450                                                         |
| Crystal habit                                   | colorless prizm                                                               |
| F(000)                                          | 448                                                                           |
| Index ranges                                    | -12 ≤ <i>h</i> ≤ 12, -18 ≤ <i>k</i> ≤ 18, -8 ≤ <i>l</i> ≤ 10                  |
| Reflections collected                           | 21282                                                                         |
| Independent reflections                         | 2381                                                                          |
| Max. and min. transmission                      | 0.6398 / 0.7460                                                               |
| Number of ref. parameters                       | 109                                                                           |
| $R_1$ / $wR_2$ [ $I > 2\sigma(I)$ ]             | 0.0257 / 0.0640                                                               |
| $R_1$ / $wR_2$ (all data)                       | 0.0314 / 0.0671                                                               |
| Goodness-of-fit on F <sup>2</sup>               | 1.036                                                                         |
| Largest diff. peak and hole / e·Å <sup>-3</sup> | 0.433 / -0.322                                                                |
| Weight scheme                                   | w=1/[ $\sigma^2(F_o^2)+(0.0307P)^2+0.4853P$ ]<br>where P=( $F_o^2+2F_c^2$ )/3 |

**Table 2.** Selected bond lengths, bond and torsion angles in compound **7**

| Bond | <i>l</i> , Å | Angle | $\phi$ , ° | Torsion angle | $\theta$ , ° |
|------|--------------|-------|------------|---------------|--------------|
|------|--------------|-------|------------|---------------|--------------|

|        |            |           |            |              |            |
|--------|------------|-----------|------------|--------------|------------|
| C11-C4 | 1.7851(12) | O1-S1-O2  | 122.03(6)  | O1-S1-N1-C2  | -9.39(11)  |
| S1-O1  | 1.4226(10) | O1-S1-N1  | 110.36(6)  | O2-S1-N1-C2  | -146.55(9) |
| S1-O2  | 1.4255(10) | O2-S1-N1  | 109.67(6)  | C1-S1-N1-C2  | 102.80(10) |
| S1-N1  | 1.6063(10) | O1-S1-C1  | 105.31(6)  | O1-S1-N1-C3  | 152.48(8)  |
| S1-C1  | 1.8362(14) | O2-S1-C1  | 104.20(7)  | O2-S1-N1-C3  | 15.32(10)  |
| F1-C1  | 1.3248(18) | N1-S1-C1  | 103.36(6)  | C1-S1-N1-C3  | -95.33(9)  |
| F2-C1  | 1.3194(16) | C2-N1-C3  | 117.08(9)  | O1-S1-C1-F2  | -67.78(12) |
| F3-C1  | 1.3230(18) | C3-C4-C11 | 109.67(8)  | N1-S1-C1-F2  | 176.39(10) |
| N1-C2  | 1.4800(14) | C3-N1-S1  | 119.44(8)  | C3-N1-C2-C3  | 55.64(13)  |
| N1-C3  | 1.4819(14) | F2-C1-F3  | 108.65(12) | S1-N1-C2-C3  | -142.08(8) |
| C2-C3  | 1.5266(16) | F2-C1-S1  | 109.81(10) | N1-C2-C3-C4  | 72.09(12)  |
| C3-N1  | 1.4819(14) | C2-C3-C4  | 114.50(10) | N1-C3-C4-C11 | -171.93(8) |
| C3-C4  | 1.5277(16) | N1-C2-C3  | 109.95(9)  | C2-C3-C4-C11 | 65.83(11)  |

**Figure 2. Molecular structure of compound 10**

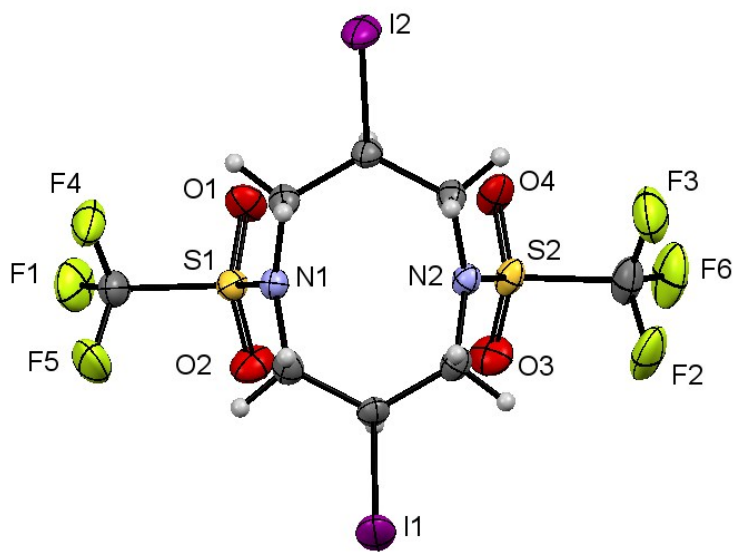

**Table 3.** Crystal Data, Details of Intensity Measurements, and Structure Refinement for compound **10**

---

|                                                 |                                                                                                           |
|-------------------------------------------------|-----------------------------------------------------------------------------------------------------------|
| Empirical formula                               | C <sub>8</sub> H <sub>10</sub> F <sub>6</sub> I <sub>2</sub> N <sub>2</sub> O <sub>4</sub> S <sub>2</sub> |
| Formula weight / g·mol <sup>-1</sup>            | 630.10                                                                                                    |
| Crystal system                                  | monoclinic                                                                                                |
| Space group                                     | P 21/c                                                                                                    |
| <i>a</i> / Å                                    | 11.305(2)                                                                                                 |
| <i>b</i> / Å                                    | 17.982(3)                                                                                                 |
| <i>c</i> / Å                                    | 18.058(3)                                                                                                 |
| $\alpha$ / °                                    | 90                                                                                                        |
| $\beta$ / °                                     | 100.155(5)                                                                                                |
| $\gamma$ / °                                    | 90                                                                                                        |
| Volume / Å <sup>3</sup>                         | 3613.5(9)                                                                                                 |
| <i>Z</i>                                        | 8                                                                                                         |
| Density (calculated) / g·cm <sup>-3</sup>       | 2.316                                                                                                     |
| Absorptions coefficient / mm <sup>-1</sup>      | 3.786                                                                                                     |
| Radiation ( $\lambda$ / Å)                      | MoK $\alpha$ (0.71073)                                                                                    |
| Temperature / K                                 | 100(2)                                                                                                    |
| 2 $\theta$ range / °                            | 4.30 – 60.30                                                                                              |
| Crystal size / mm                               | 0.310 × 0.410 × 0.500                                                                                     |
| Crystal habit                                   | colorless plate                                                                                           |
| F(000)                                          | 2368                                                                                                      |
| Index ranges                                    | -15 ≤ <i>h</i> ≤ 15, -25 ≤ <i>k</i> ≤ 25, -25 ≤ <i>l</i> ≤ 25                                             |
| Reflections collected                           | 147899                                                                                                    |
| Independent reflections                         | 10609                                                                                                     |
| Max. and min. transmission                      | 0.362 / 0.746                                                                                             |
| Number of ref. parameters                       | 434                                                                                                       |
| $R_1$ / $wR_2$ [ $I > 2\sigma(I)$ ]             | 0.0431 / 0.0891                                                                                           |
| $R_1$ / $wR_2$ (all data)                       | 0.0786 / 0.1031                                                                                           |
| Goodness-of-fit on F <sup>2</sup>               | 1.056                                                                                                     |
| Largest diff. peak and hole / e·Å <sup>-3</sup> | 2.096 / -2.015                                                                                            |

---

$$w=1/[\sigma^2(F_o^2)+(0.0361P)^2+ 11.1751P], \text{ where } P=(F_o^2+2F_c^2)/3$$

**Table 4.** Selected bond lengths, bond and torsion angles in compound **10**

| Bond  | <i>l</i> , Å | Angle    | $\varphi$ , ° | Torsion angle | $\theta$ , ° |
|-------|--------------|----------|---------------|---------------|--------------|
| I1-C4 | 2.159(4)     | O2-S1-O1 | 122.1(2)      | C4-C2-N2-C8   | 104.7(4)     |
| I2-C7 | 2.165(4)     | O2-S1-N1 | 109.8(2)      | C4-C2-N2-S2   | -86.1(4)     |
| S1-O2 | 1.415(3)     | O2-S1-C1 | 105.0(2)      | O3-S2-N2-C2   | 30.4(4)      |
| S1-O1 | 1.424(3)     | N1-S1-C1 | 105.8(2)      | C5-S2-N2-C2   | -81.5(4)     |
| S1-N1 | 1.596(4)     | F1-C1-S1 | 109.1(4)      | O2-S1-C1-F1   | -67.5(4)     |
| S1-C1 | 1.840(5)     | C2-C4-I1 | 106.3(3)      | N1-S1-C1-F1   | 176.5(3)     |
| F1-C1 | 1.329(6)     | C8-C7-C6 | 116.8(4)      | O2-S1-N1-C6   | 162.7(3)     |
| C2-N2 | 1.482(5)     | F2-C5-F3 | 108.7(5)      | S1-N1-C6-C7   | -86.2(4)     |
| C2-C4 | 1.512(6)     | N1-C6-C7 | 113.5(3)      | C3-N1-C6-C7   | 105.1(4)     |
| N2-C8 | 1.490(5)     | C2-C4-C3 | 117.2(4)      | N1-C6-C7-C8   | -64.4(5)     |

**Figure 3. Molecular structure of compound 11**

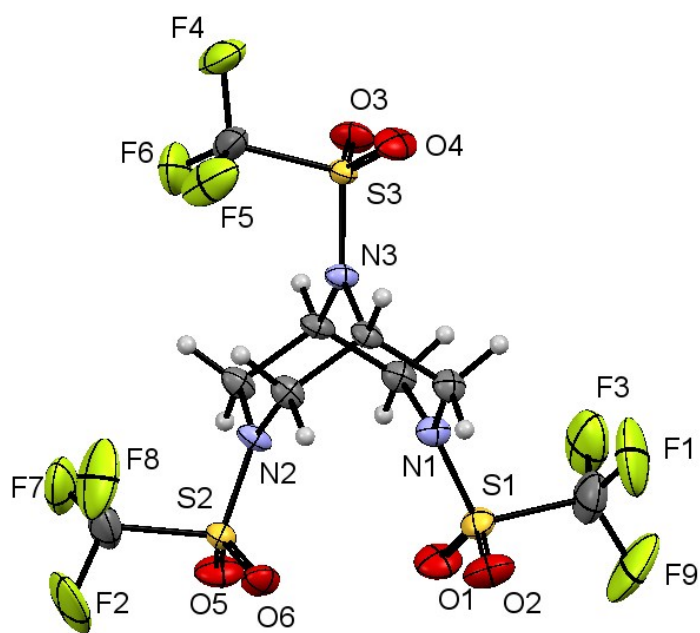



**Table 5.** Crystal Data, Details of Intensity Measurements, and Structure Refinement for compound **11**

---

|                                                                                      |                                                                                            |
|--------------------------------------------------------------------------------------|--------------------------------------------------------------------------------------------|
| Empirical formula                                                                    | C <sub>9</sub> H <sub>10</sub> F <sub>9</sub> N <sub>3</sub> O <sub>6</sub> S <sub>3</sub> |
| Formula weight / g·mol <sup>-1</sup>                                                 | 523.38                                                                                     |
| Crystal system                                                                       | triclinic                                                                                  |
| Space group                                                                          | P-1                                                                                        |
| <i>a</i> / Å                                                                         | 11.214(4)                                                                                  |
| <i>b</i> / Å                                                                         | 11.857(5)                                                                                  |
| <i>c</i> / Å                                                                         | 14.834(7)                                                                                  |
| $\alpha$ / °                                                                         | 73.267(1)                                                                                  |
| $\beta$ / °                                                                          | 78.954(1)                                                                                  |
| $\gamma$ / °                                                                         | 80.979(1)                                                                                  |
| Volume / Å <sup>3</sup>                                                              | 1848.0(1)                                                                                  |
| <i>Z</i>                                                                             | 4                                                                                          |
| Density (calculated) / g·cm <sup>-3</sup>                                            | 1.883                                                                                      |
| Absorptions coefficient / mm <sup>-1</sup>                                           | 0.525                                                                                      |
| Radiation ( $\lambda$ / Å)                                                           | MoK $\alpha$ (0.71073)                                                                     |
| Temperature / K                                                                      | 100(2)                                                                                     |
| 2 $\theta$ range / °                                                                 | 4.92 – 60.24                                                                               |
| Crystal size / mm                                                                    | 0.370 × 0.430 × 0.500                                                                      |
| Crystal habit                                                                        | colorless prizm                                                                            |
| F(000)                                                                               | 1050                                                                                       |
| Index ranges                                                                         | -15 ≤ <i>h</i> ≤ 15, -16 ≤ <i>k</i> ≤ 16, -21 ≤ <i>l</i> ≤ 21                              |
| Reflections collected                                                                | 40457                                                                                      |
| Independent reflections                                                              | 9983                                                                                       |
| Max. and min. transmission                                                           | 0.780 / 0.830                                                                              |
| Number of ref. parameters                                                            | 541                                                                                        |
| <i>R</i> <sub>1</sub> / <i>wR</i> <sub>2</sub> [ <i>I</i> > 2 $\sigma$ ( <i>I</i> )] | 0.0792 / 0.2262                                                                            |
| <i>R</i> <sub>1</sub> / <i>wR</i> <sub>2</sub> (all data)                            | 0.1164 / 0.2648                                                                            |
| Goodness-of-fit on F <sup>2</sup>                                                    | 1.051                                                                                      |
| Largest diff. peak and hole / e·Å <sup>-3</sup>                                      | 1.486 / -1.469                                                                             |

---

$$w=1/[\sigma^2(F_o^2)+(0.1227P)^2+ 9.1291P], \text{ where } P=(F_o^2+2F_c^2)/3$$

**Table 6.** Selected bond lengths, bond and torsion angles in compound **11**

---

| Bond  | <i>l</i> , Å | Angle    | $\varphi$ , ° | Torsion angle | $\theta$ , ° |
|-------|--------------|----------|---------------|---------------|--------------|
| S1-O1 | 1.416(4)     | O1-S1-O2 | 121.7(3)      | O1-S1-N1-C9   | -32.1(4)     |
| S1-O2 | 1.422(4)     | O1-S1-N1 | 109.8(2)      | O2-S1-N1-C9   | -168.1(4)    |
| S1-N1 | 1.587(4)     | O1-S1-C1 | 104.5(3)      | C1-S1-N1-C9   | 80.0(4)      |
| S1-C1 | 1.834(6)     | N1-S1-C1 | 105.6(3)      | O1-S1-N1-C2   | 167.4(4)     |
| F1-C1 | 1.322(9)     | C9-N1-C2 | 115.9(3)      | C5-S2-N2-C4   | 87.3(4)      |
| F2-C5 | 1.298(8)     | F9-C1-F1 | 109.3(6)      | S4-N4-C16-C10 | 147.4(3)     |
| F3-C1 | 1.330(8)     | F1-C1-S1 | 109.6(5)      | N1-S1-C1-F9   | -177.7(5)    |
| N1-C9 | 1.466(5)     | N1-C2-C3 | 110.5(3)      | O1-S1-C1-F1   | 176.9(5)     |
| N1-C2 | 1.477(5)     | N3-C3-C2 | 107.6(3)      | O2-S1-C1-F1   | -54.2(6)     |
| C2-C3 | 1.534(6)     | C2-C3-C4 | 114.9(4)      | N1-S1-C1-F1   | 61.1(6)      |
| S1-O1 | 1.416(4)     | O1-S1-O2 | 121.7(3)      | O1-S1-N1-C9   | -32.1(4)     |
| S1-O2 | 1.422(4)     | O1-S1-N1 | 109.8(2)      | O2-S1-N1-C9   | -168.1(4)    |
| S1-N1 | 1.587(4)     | O1-S1-C1 | 104.5(3)      | C1-S1-N1-C9   | 80.0(4)      |
| S1-C1 | 1.834(6)     | N1-S1-C1 | 105.6(3)      | O1-S1-N1-C2   | 167.4(4)     |
| F1-C1 | 1.322(9)     | C9-N1-C2 | 115.9(3)      | C5-S2-N2-C4   | 87.3(4)      |

---

**Figure 4.**  $^1\text{H}$  NMR spectrum of compound 6 (400 MHz,  $\text{CD}_3\text{CN}$ ).

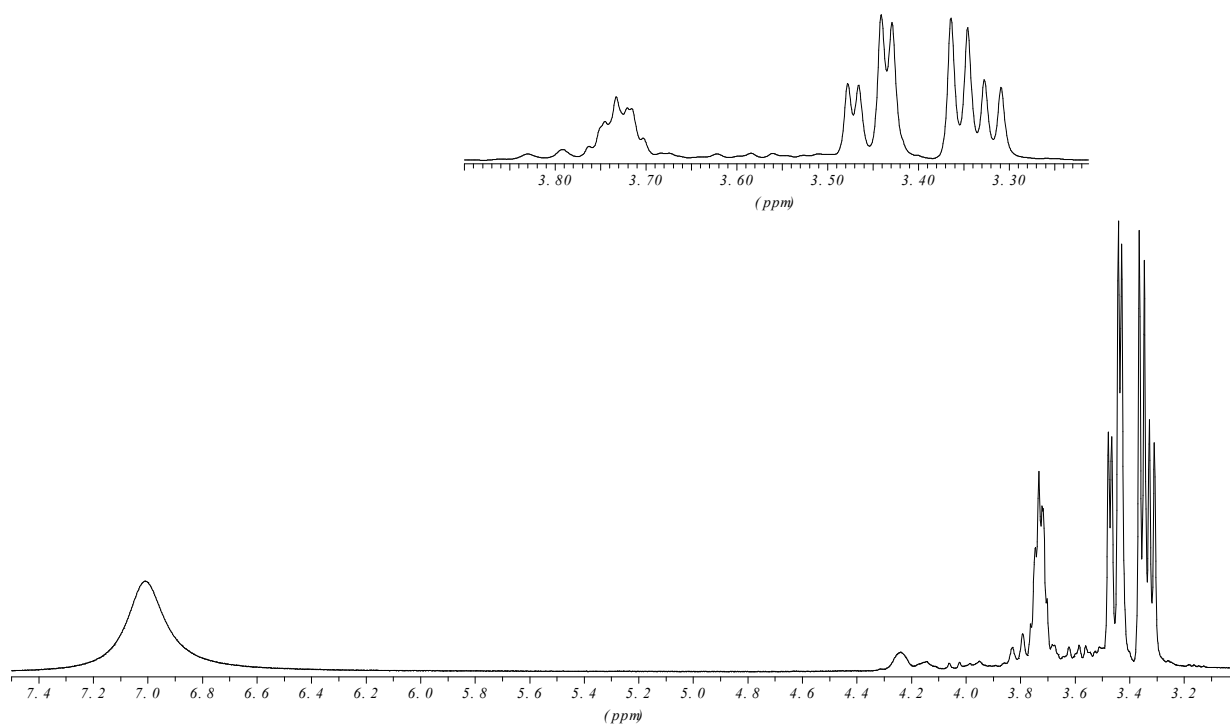

**Figure 5.**  $^{13}\text{C}$  NMR spectrum of compound 6 (400 MHz,  $\text{CD}_3\text{CN}$ ).

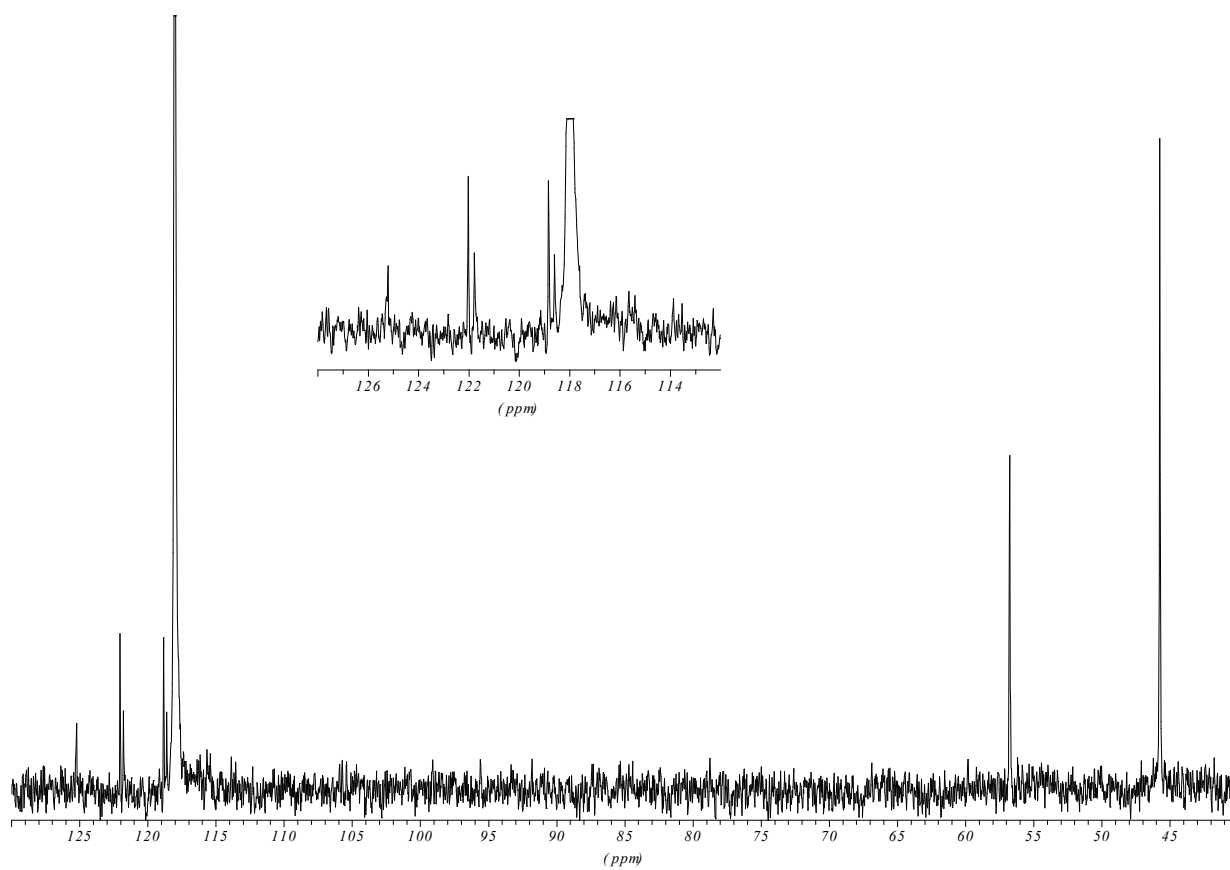

**Figure 6.**  $^{19}\text{F}$  NMR spectrum of compound 6 (400 MHz,  $\text{CD}_3\text{CN}$ ).

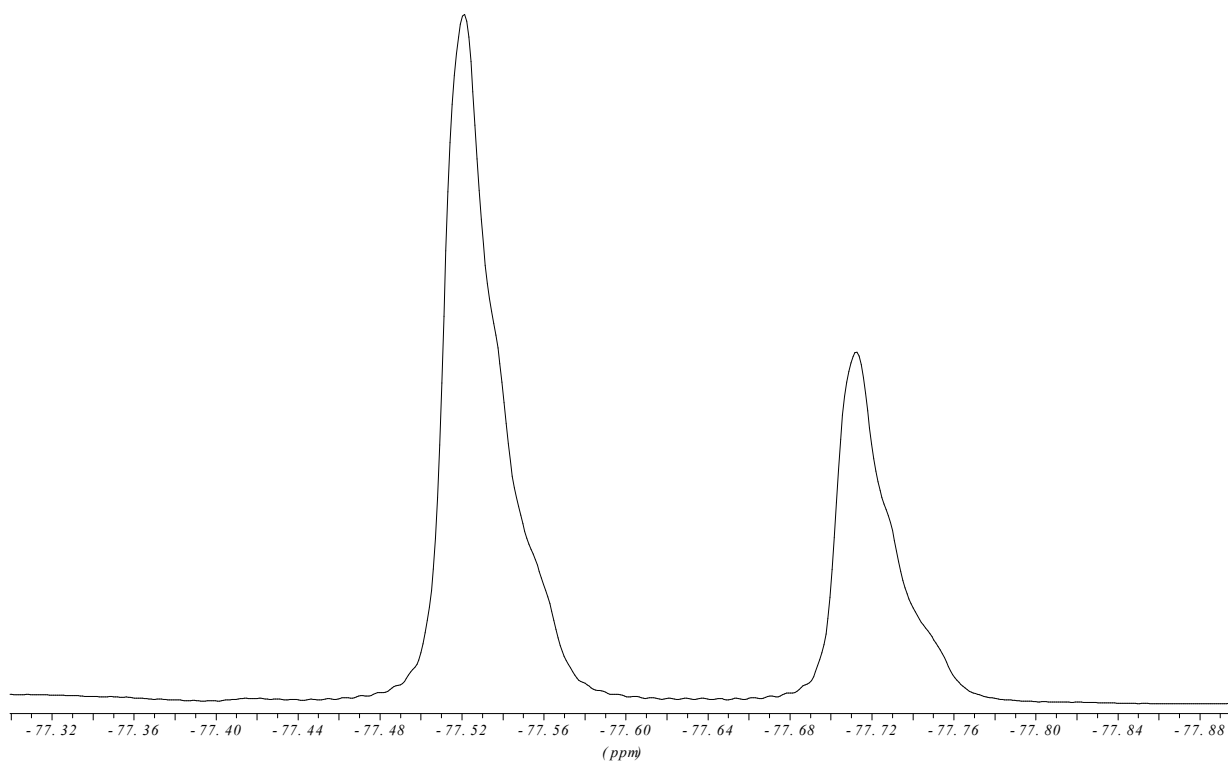

Figure 7. FT-IR spectrum of compound 6 (KBr)

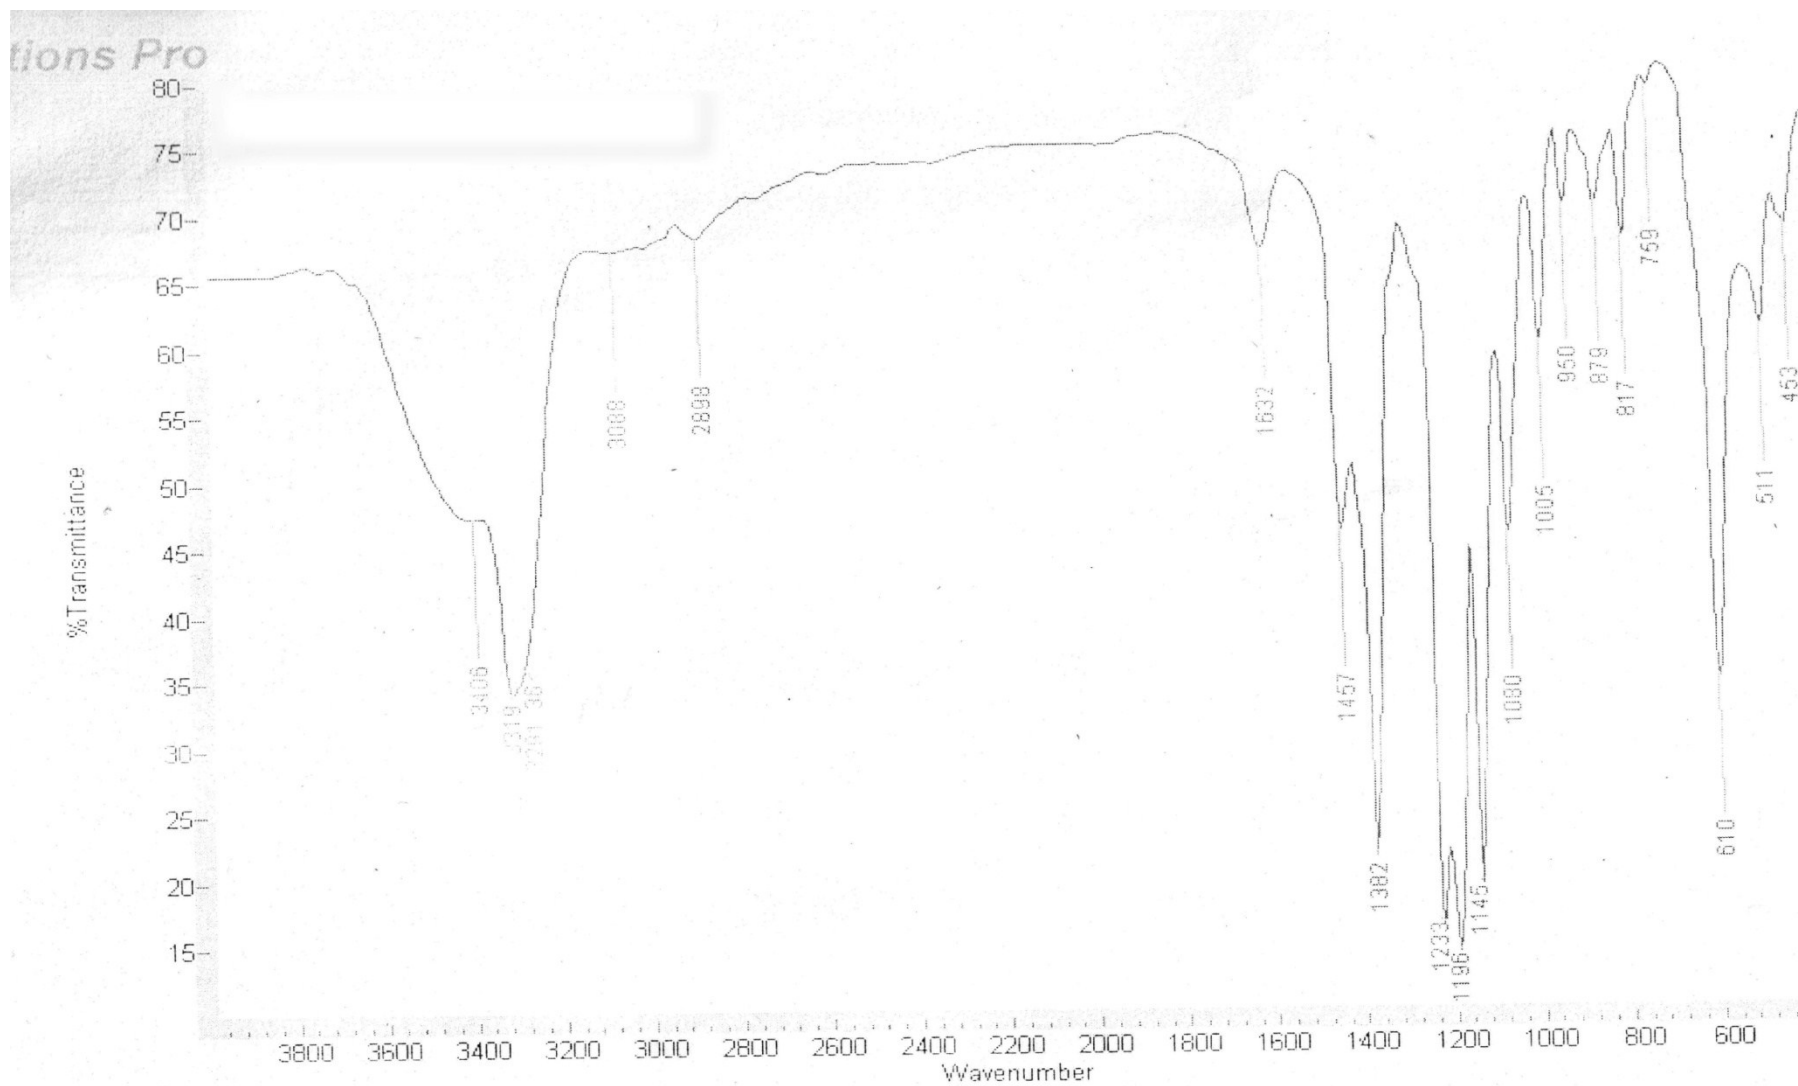

**Figure 8.**  $^1\text{H}$  NMR spectrum of compound **7** (400 MHz,  $\text{CD}_3\text{CN}$ ).

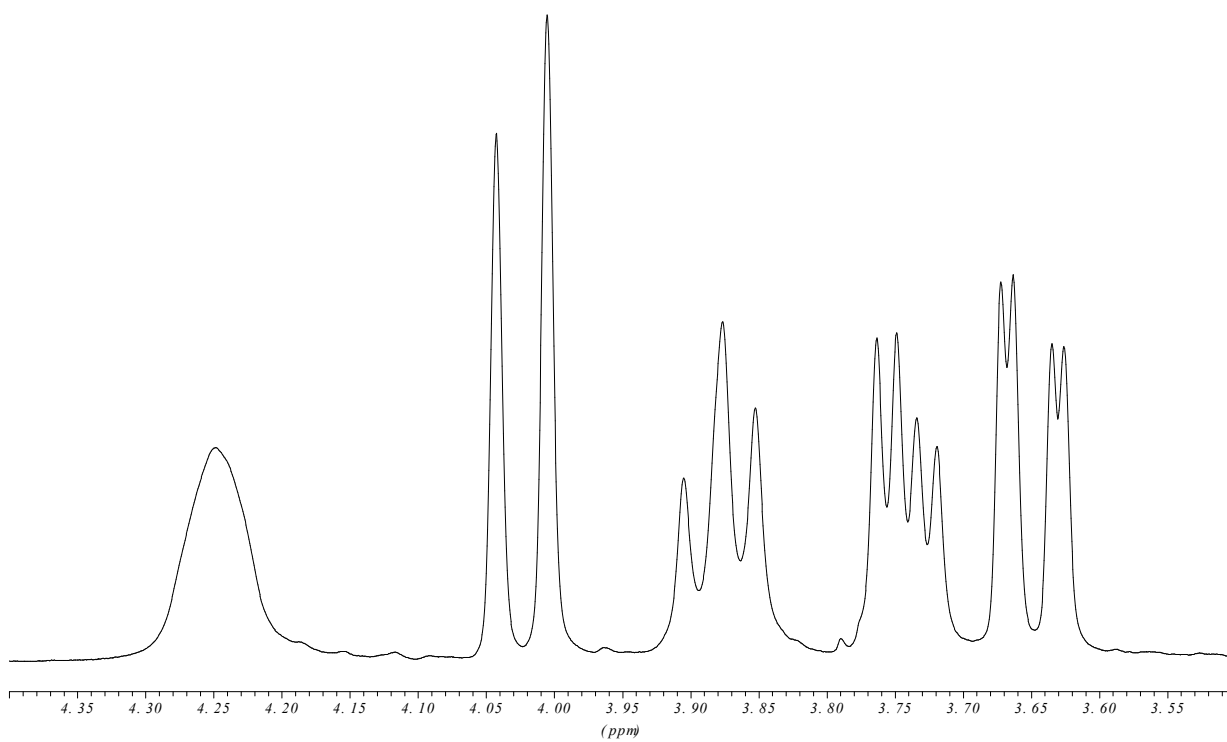

**Figure 9.**  $^{13}\text{C}$  NMR spectrum of compound **7** (400 MHz,  $\text{CD}_3\text{CN}$ ).

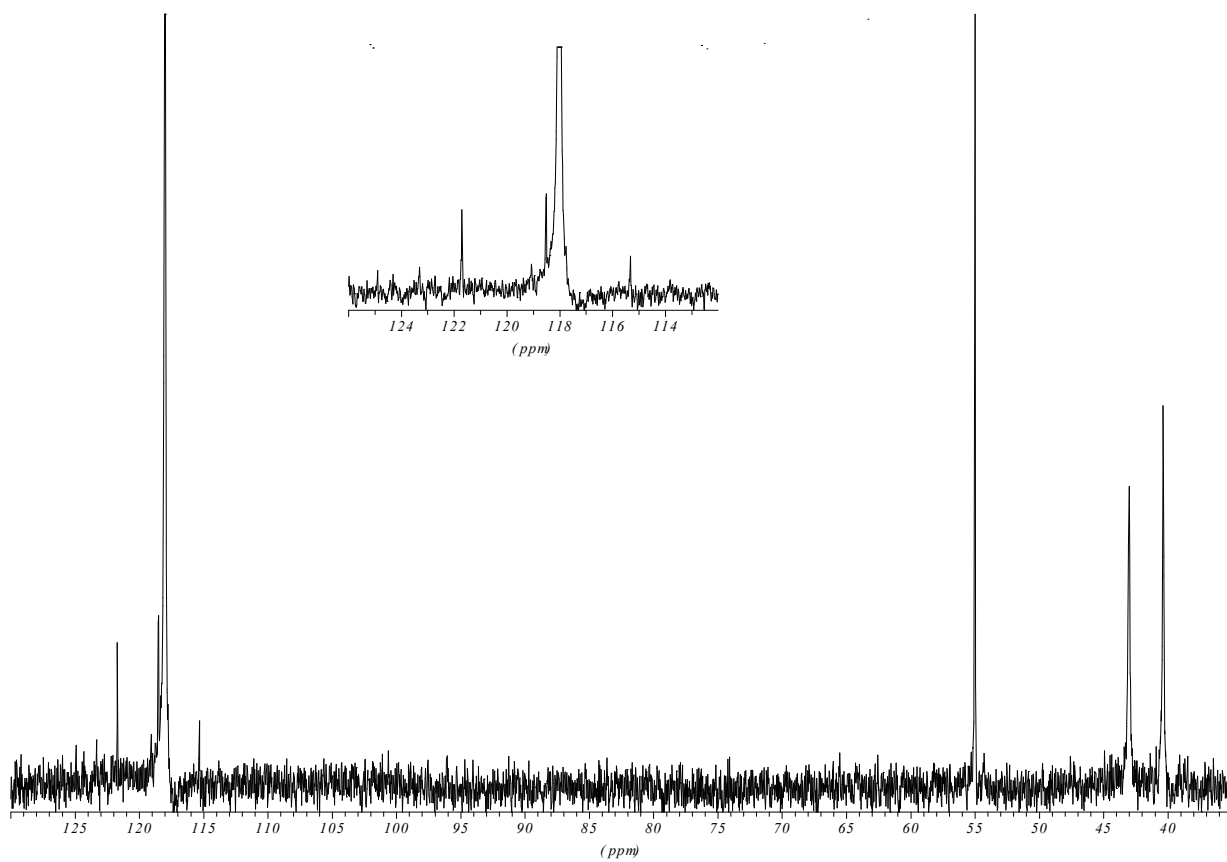



**Figure 10.**  $^{19}\text{F}$  NMR spectrum of compound 7 (400 MHz,  $\text{CD}_3\text{CN}$ ).

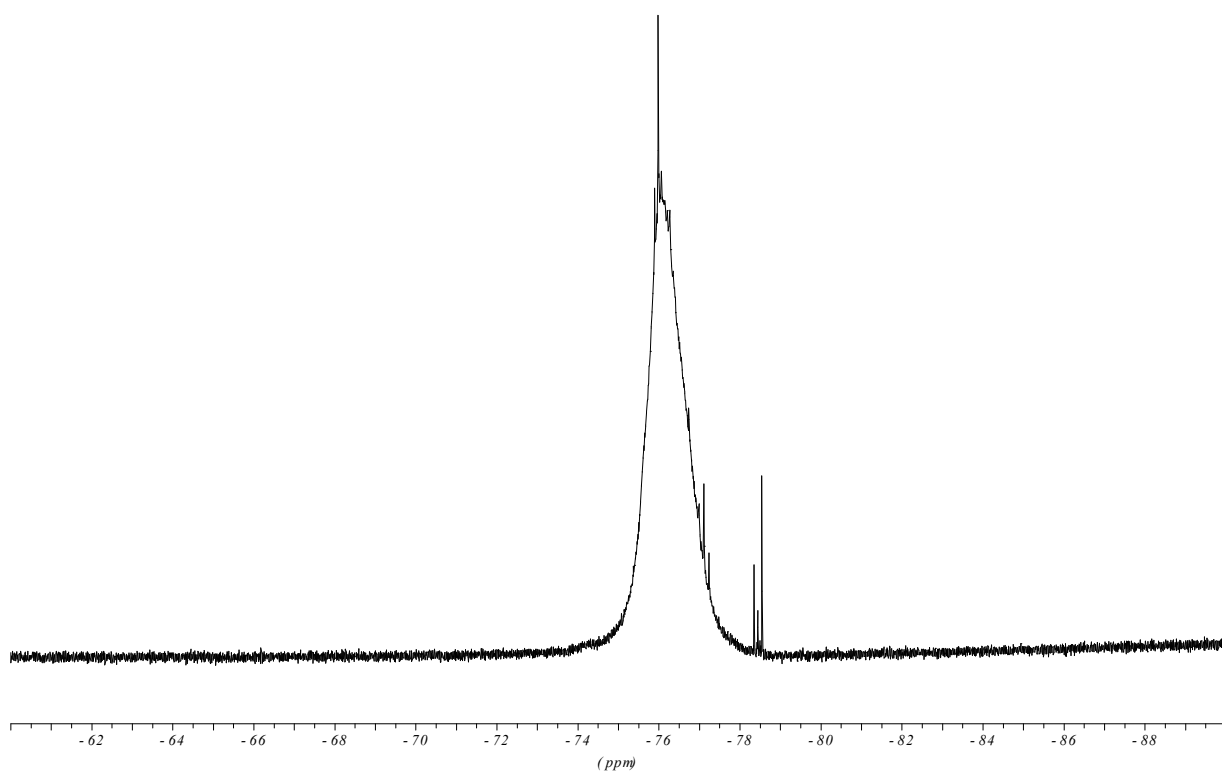

Figure 11. FT-IR spectrum of compound 7 (film)

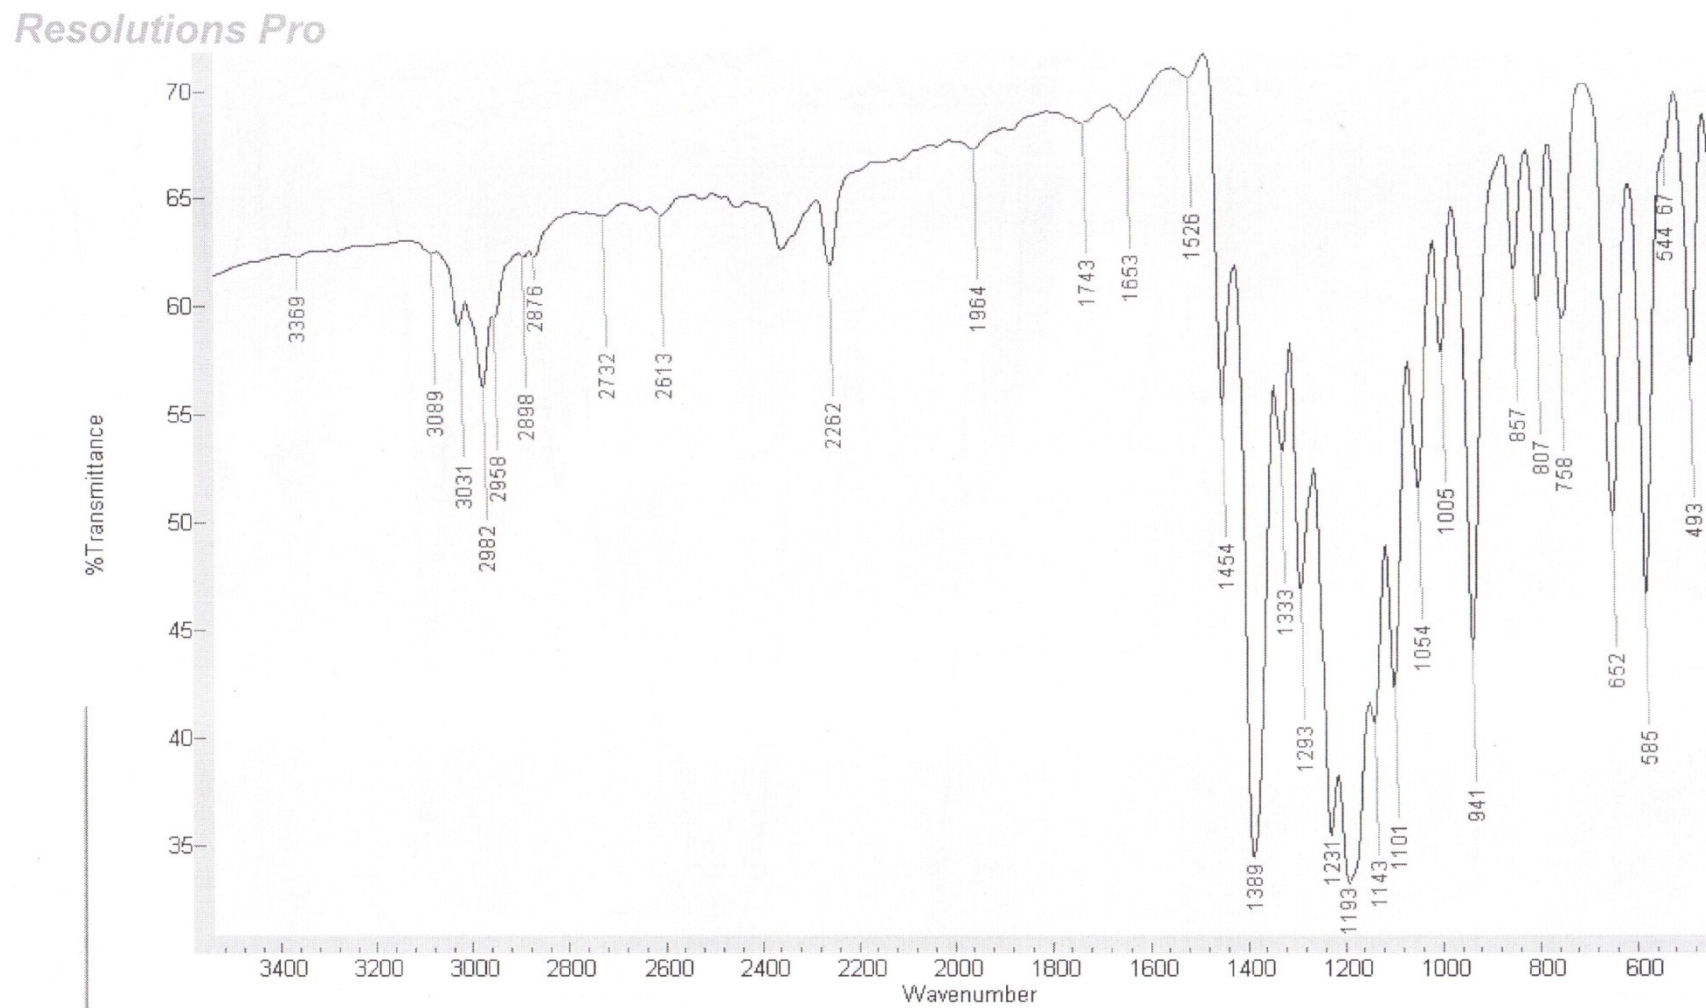

Figure 12.  $^1\text{H}$  NMR spectrum of compound 8 (400 MHz,  $\text{CDCl}_3$ ).

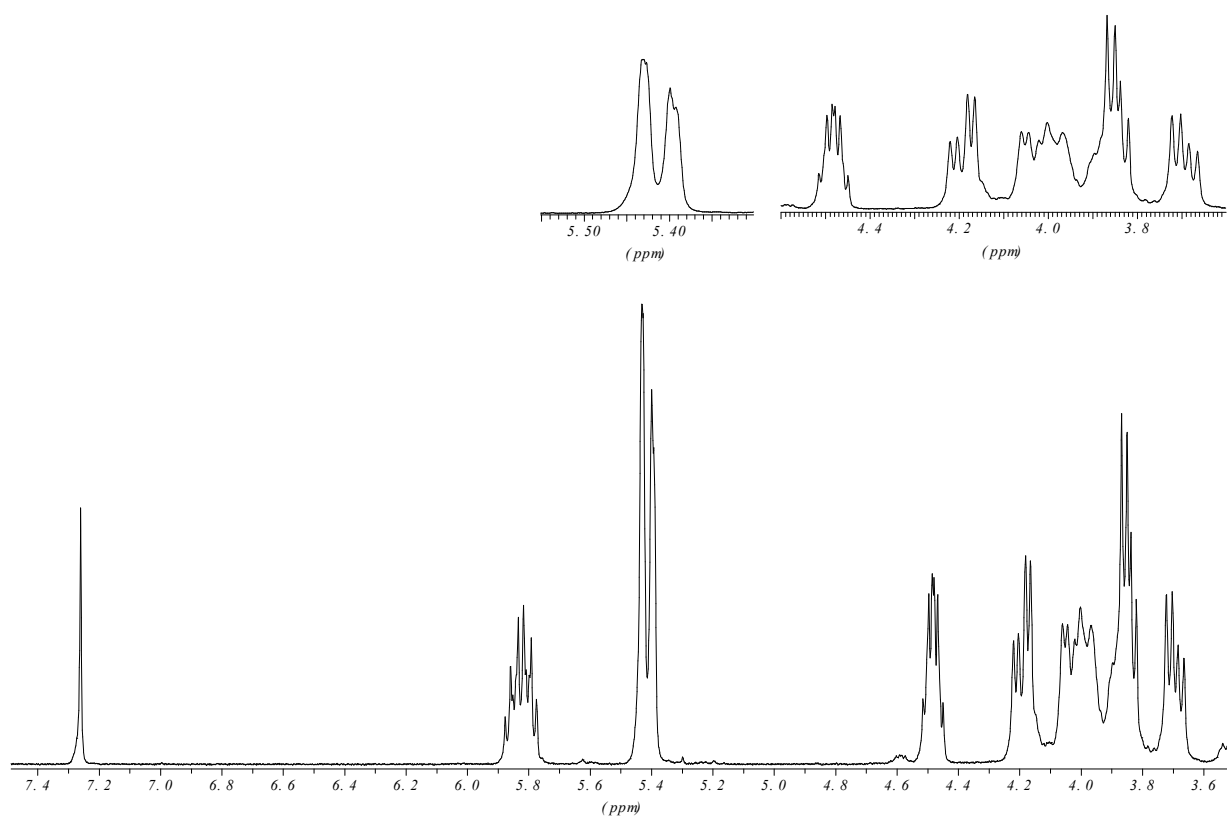

Figure 13.  $^{13}\text{C}$  NMR spectrum of compound 8 (400 MHz,  $\text{CDCl}_3$ ).

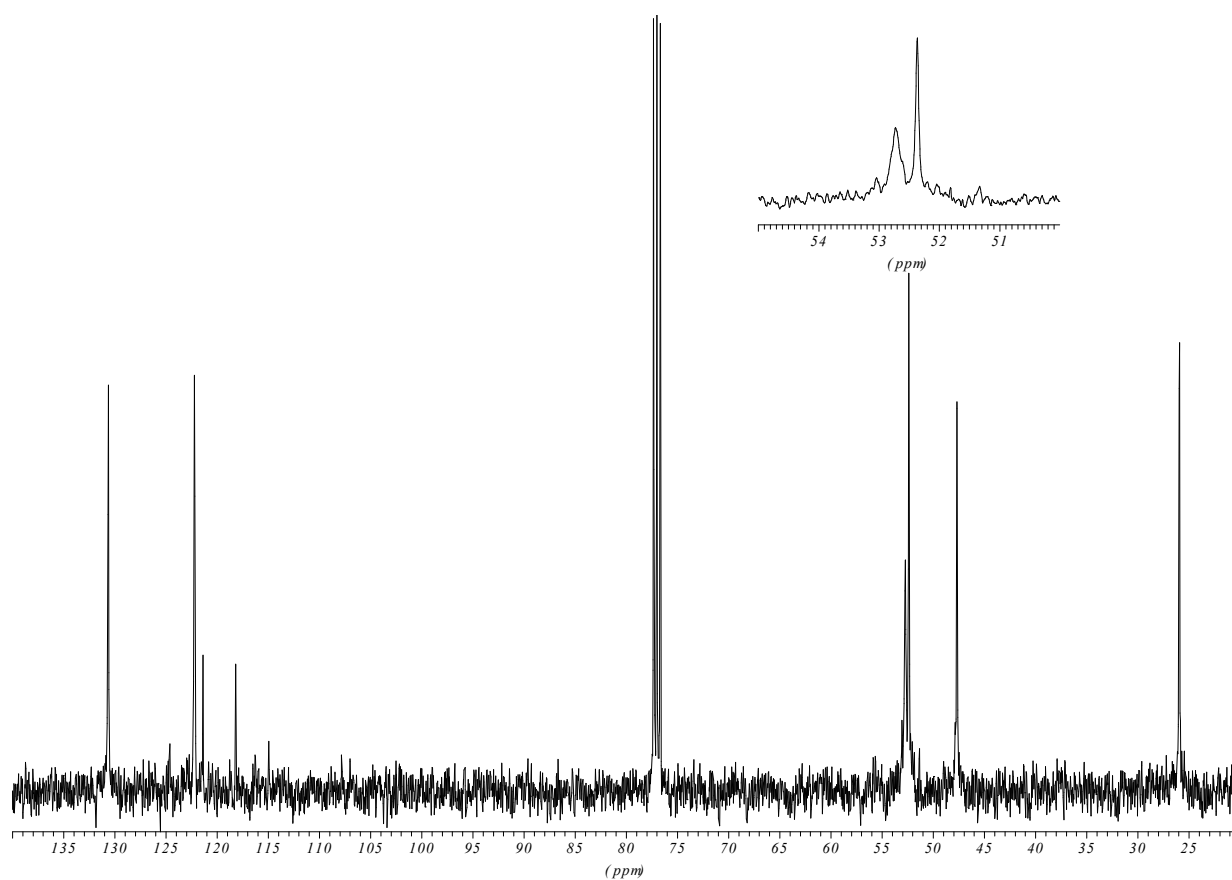

**Figure 14.**  $^{19}\text{F}$  NMR spectrum of compound **8** (400 MHz,  $\text{CDCl}_3$ ).

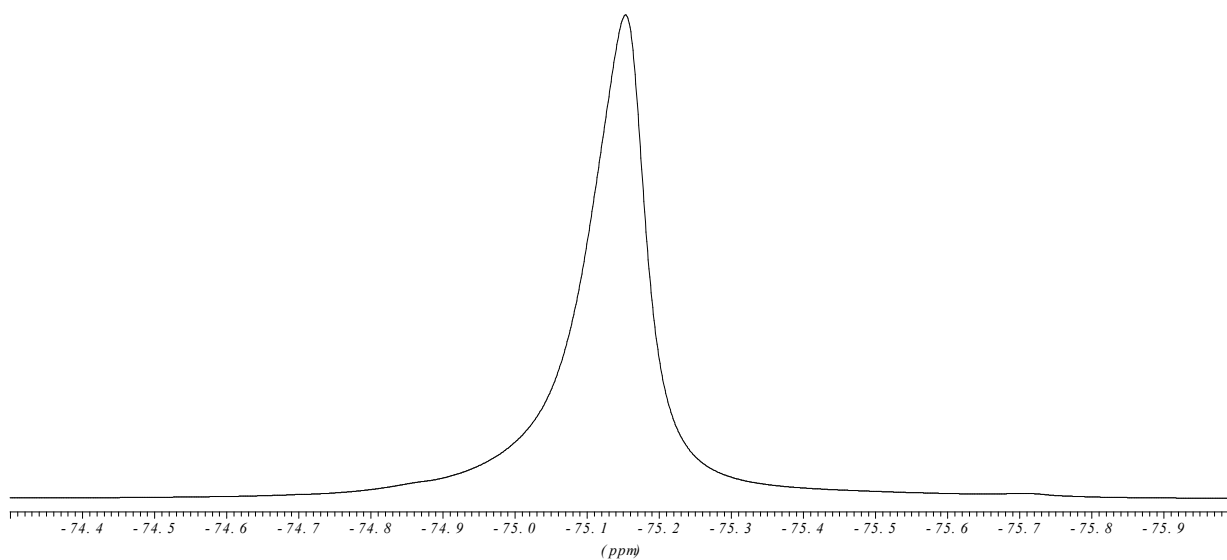

Figure 15. FT-IR spectrum of compound 8 (film)

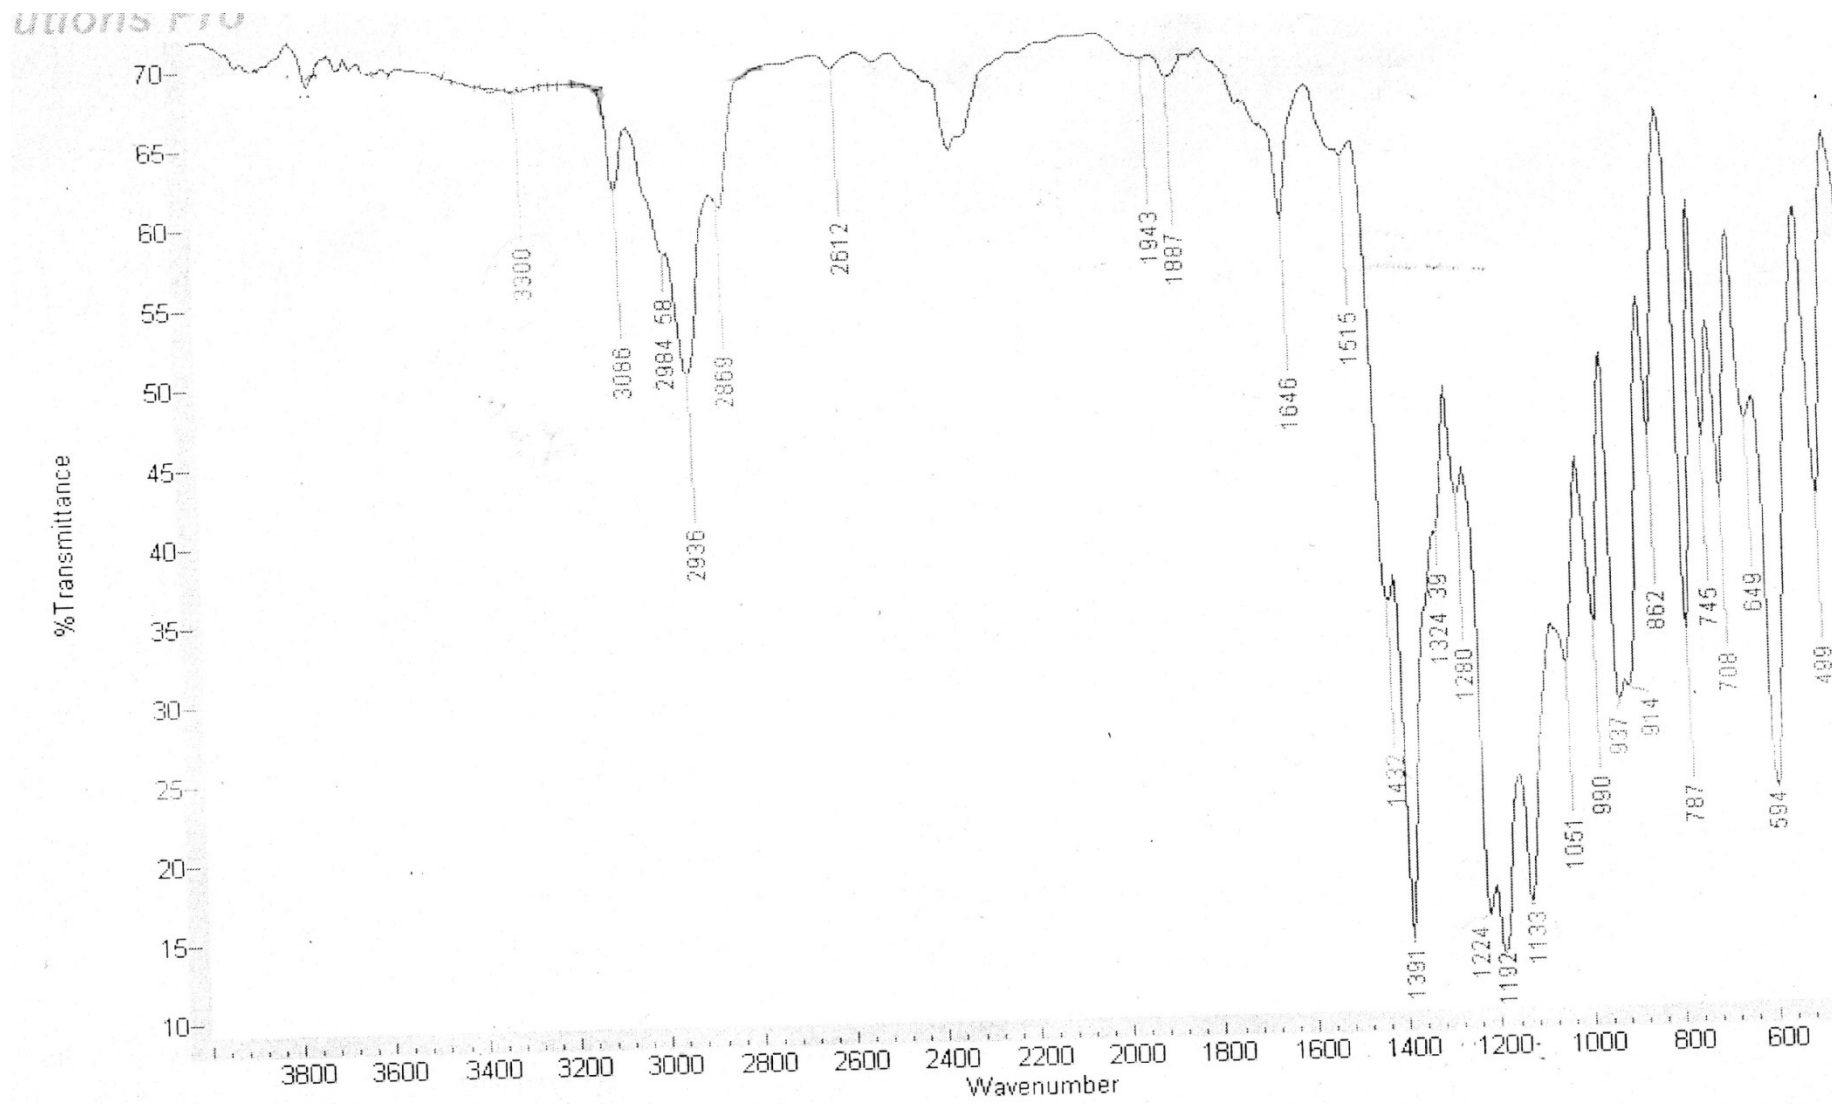

Figure 16.  $^1\text{H}$  NMR spectrum of compound 9 (400 MHz,  $\text{CDCl}_3$ ).

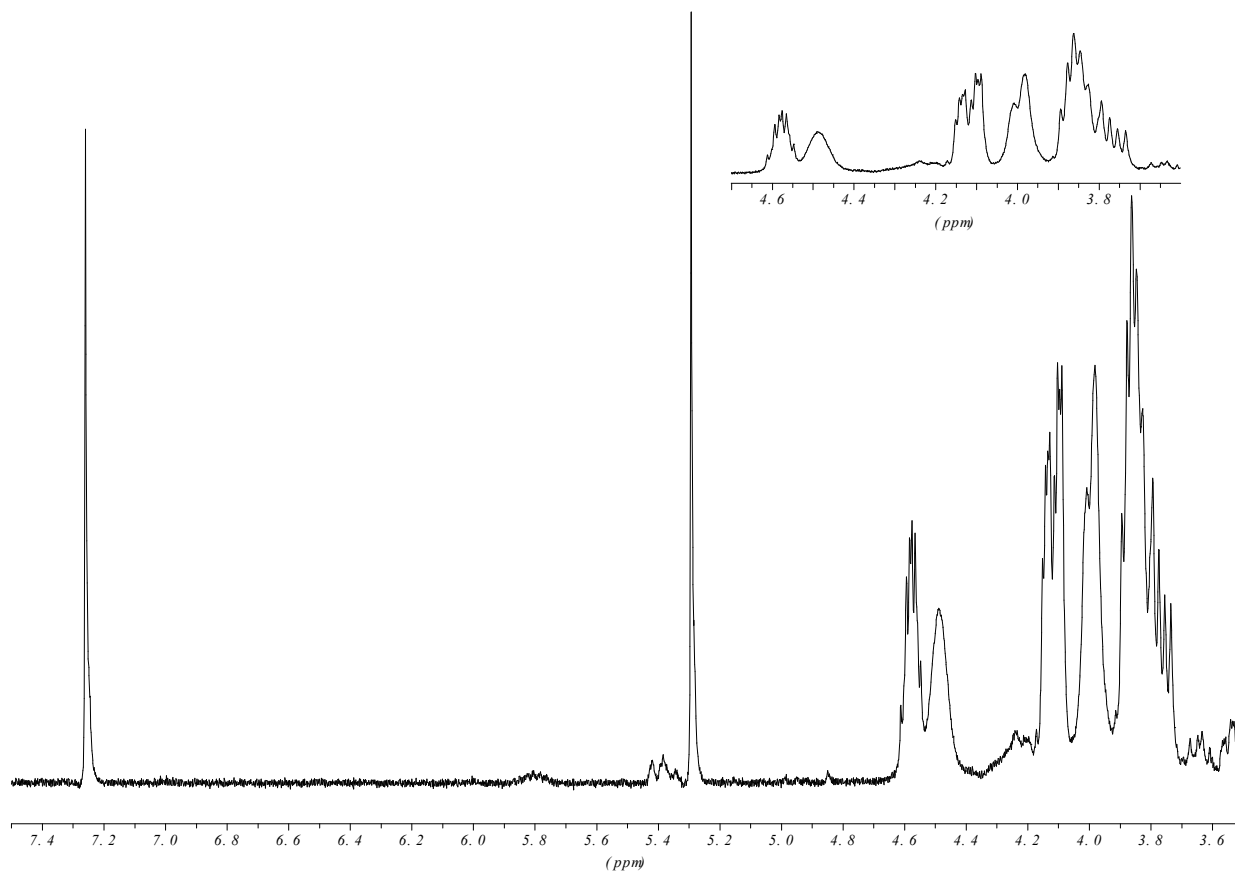

Figure 17.  $^{13}\text{C}$  NMR spectrum of compound 9 (400 MHz,  $\text{CDCl}_3$ ).

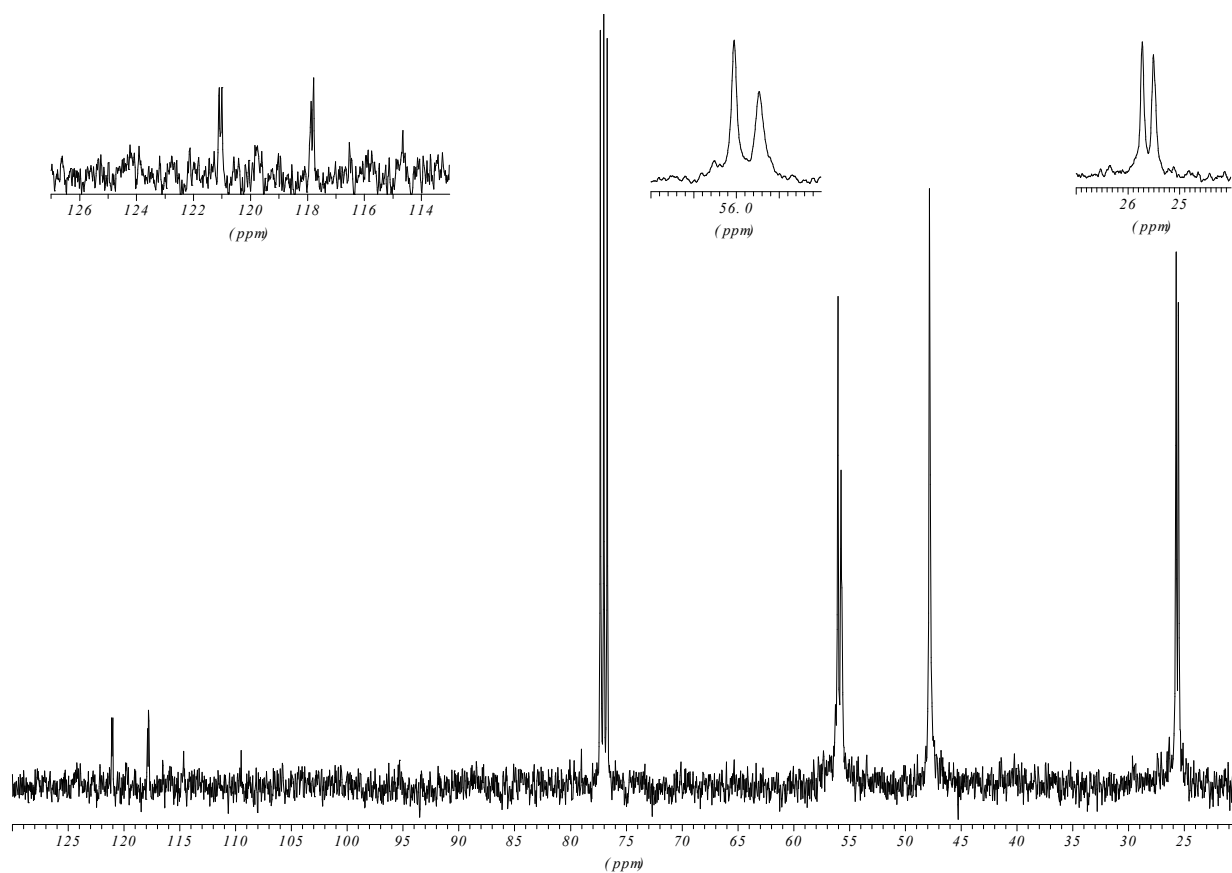



Figure 18.  $^{13}\text{C}$  NMR (*J*-modulation) spectrum of compound 9 (400 MHz,  $\text{CDCl}_3$ ).

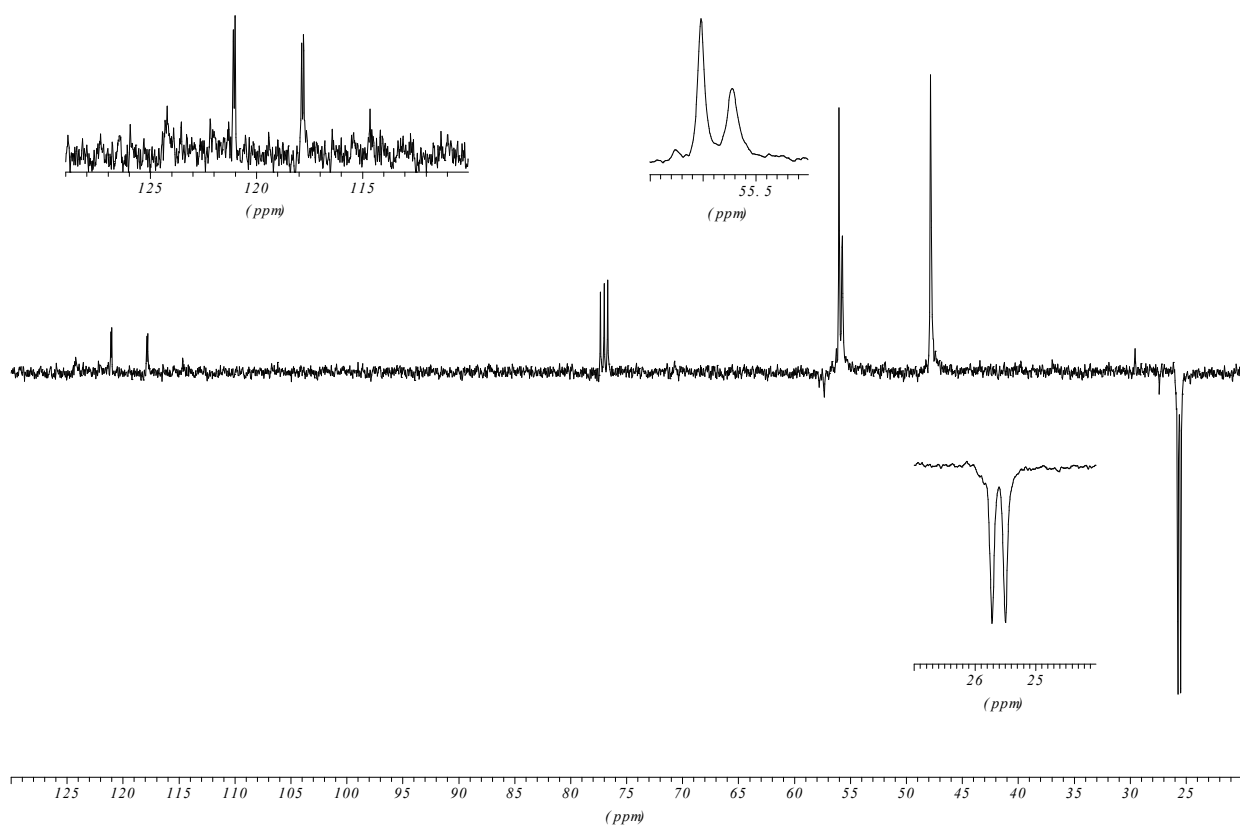

**Figure 19.**  $^{19}\text{F}$  NMR spectrum of compound **9** (400 MHz,  $\text{CDCl}_3$ ).

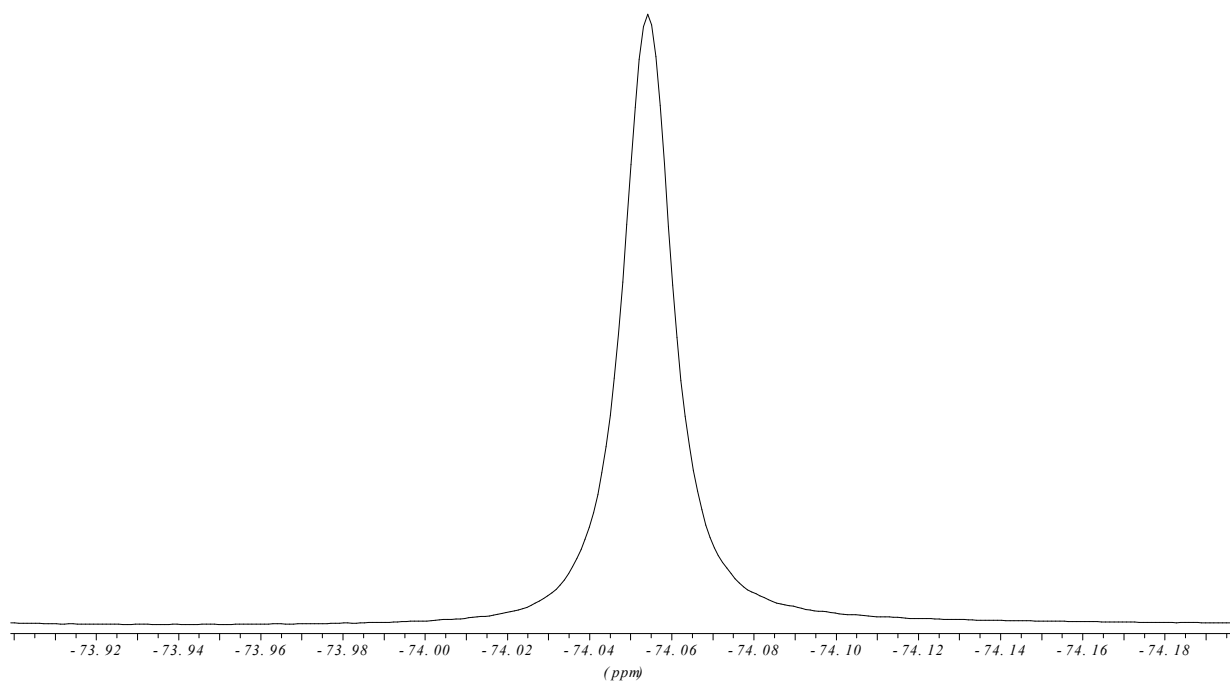

Figure 20. FT-IR spectrum of compound 9 (film)

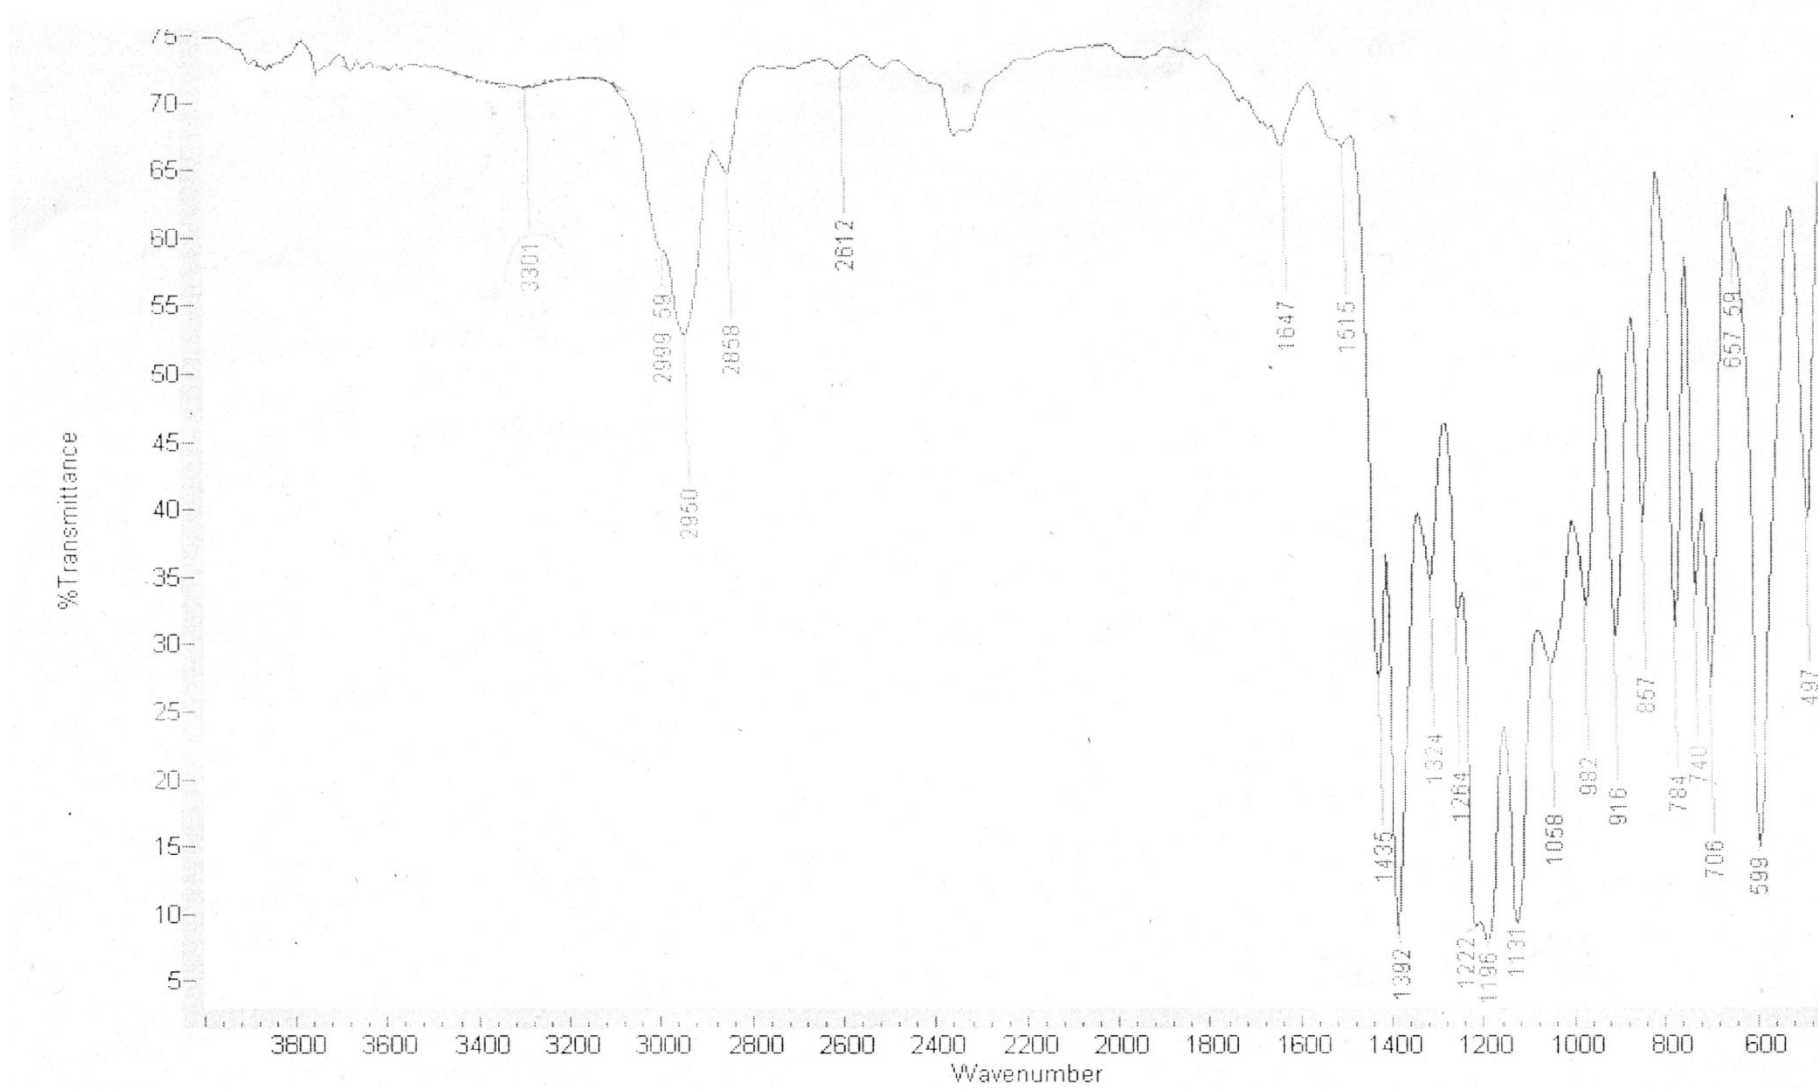

**Figure 21.  $^1\text{H}$  NMR spectrum of compound 10 (400 MHz,  $\text{CD}_3\text{CN}$ ).**

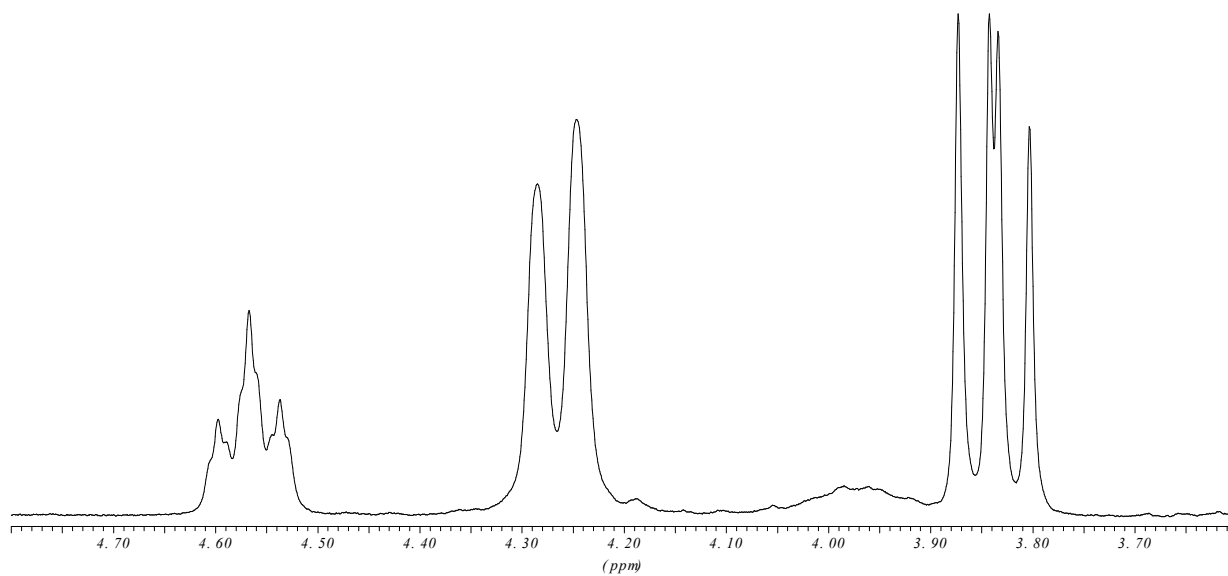

Figure 22.  $^{13}\text{C}$  NMR spectrum of compound 10 (400 MHz,  $\text{CD}_3\text{CN}$ ).

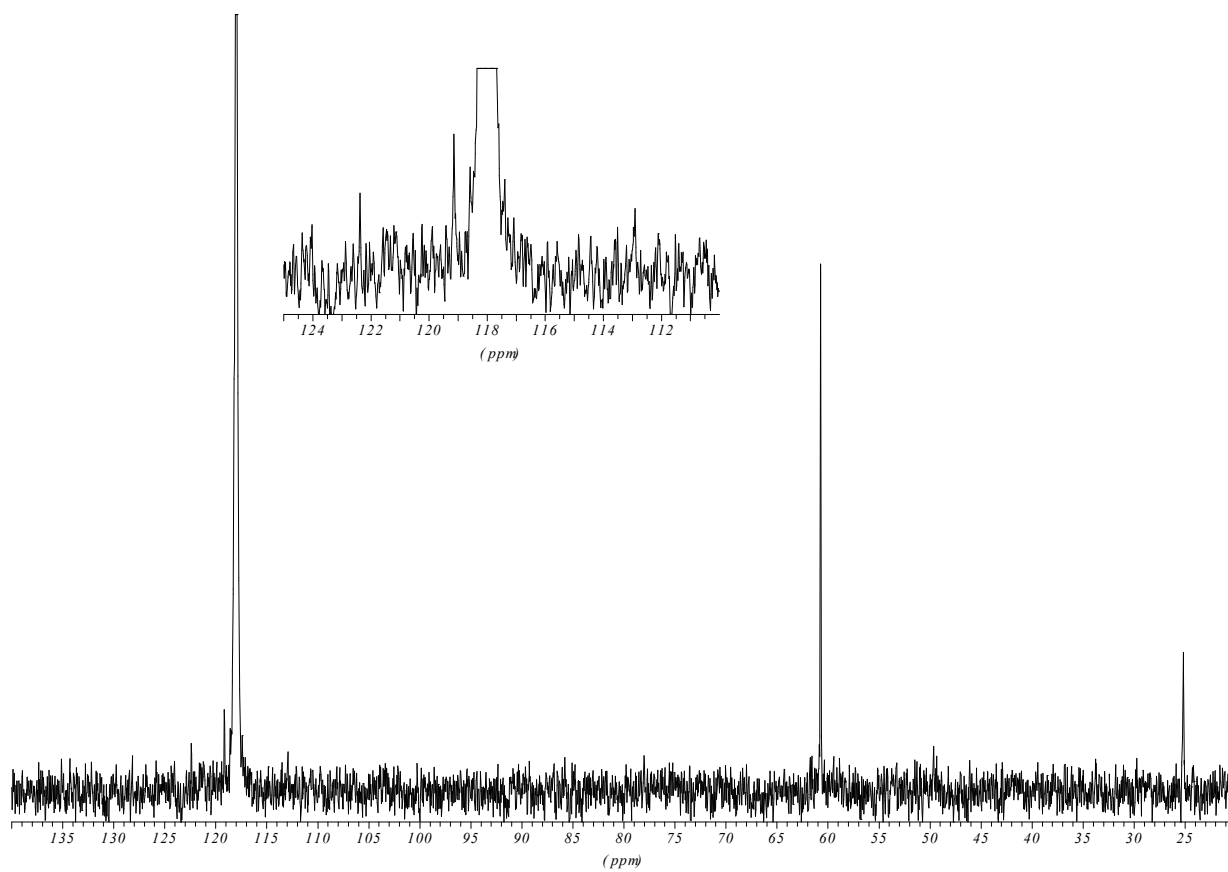

**Figure 23.**  $^{19}\text{F}$  NMR spectrum of compound 10 (400 MHz,  $\text{CD}_3\text{CN}$ ).

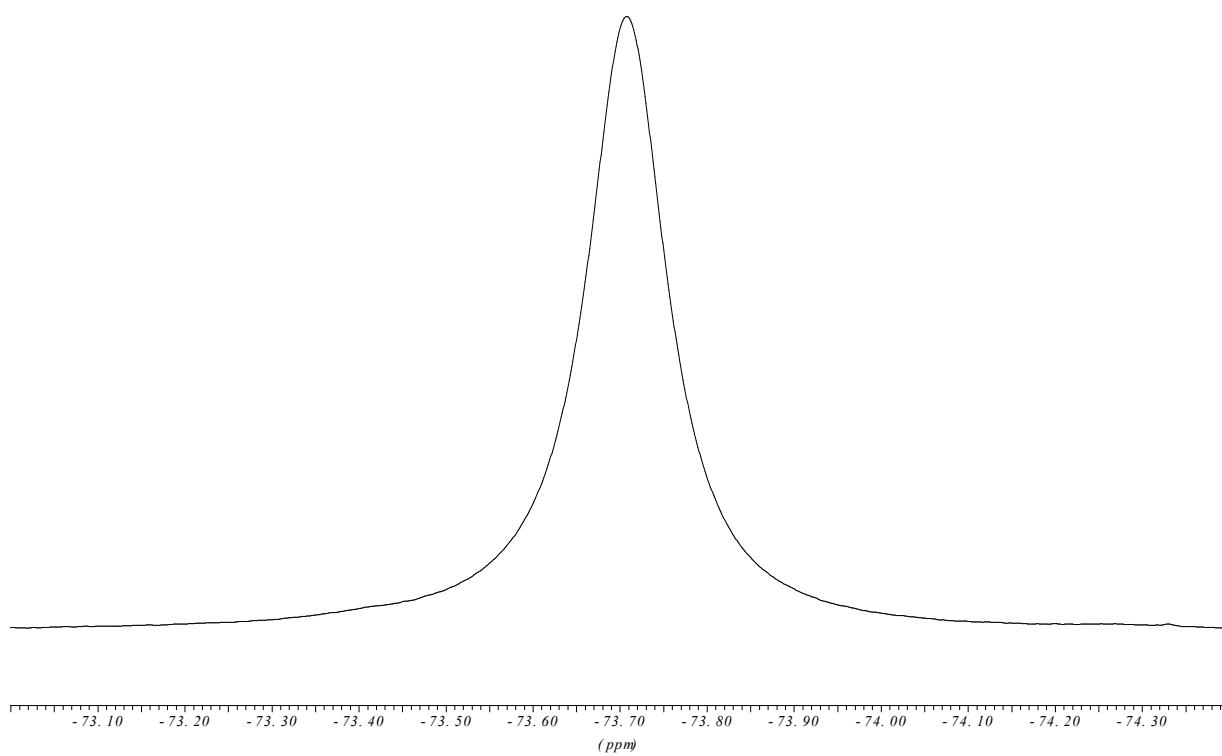

Figure 24. FT-IR spectrum of compound 10 (KBr)

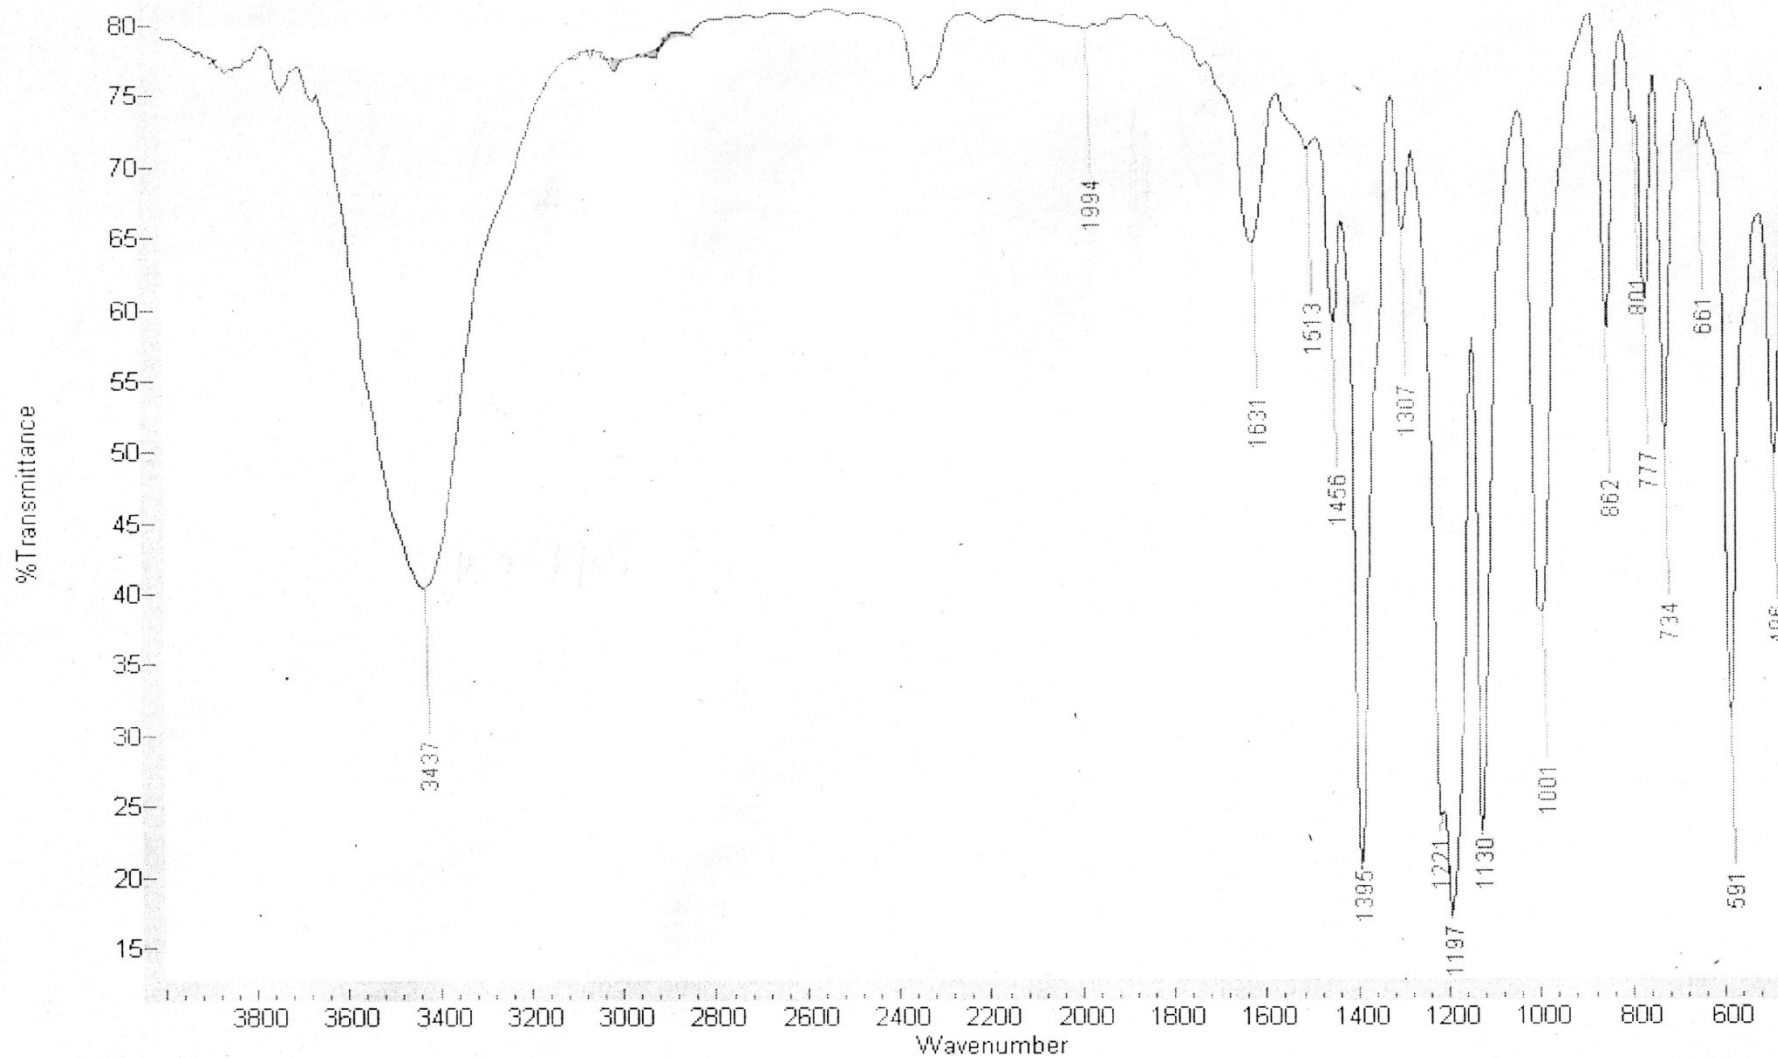

**Figure 25.**  $^1\text{H}$  NMR spectrum of compound 11 (400 MHz,  $\text{CD}_3\text{CN}$ ).

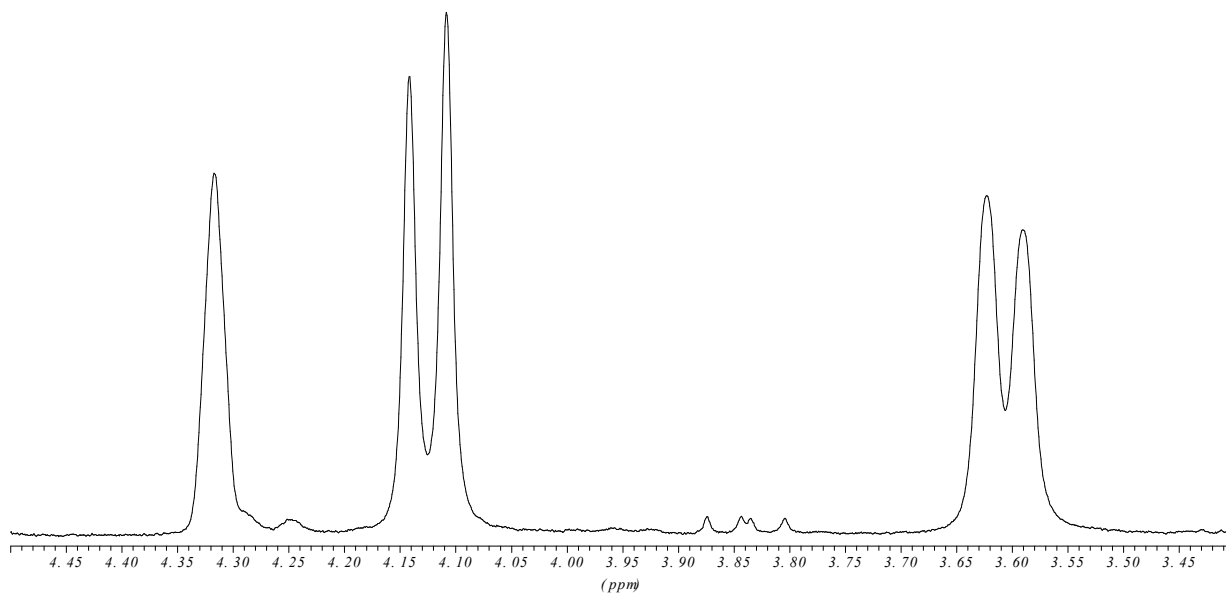



Figure 26.  $^{13}\text{C}$  NMR spectrum of compound 11 (400 MHz,  $\text{CD}_3\text{CN}$ ).

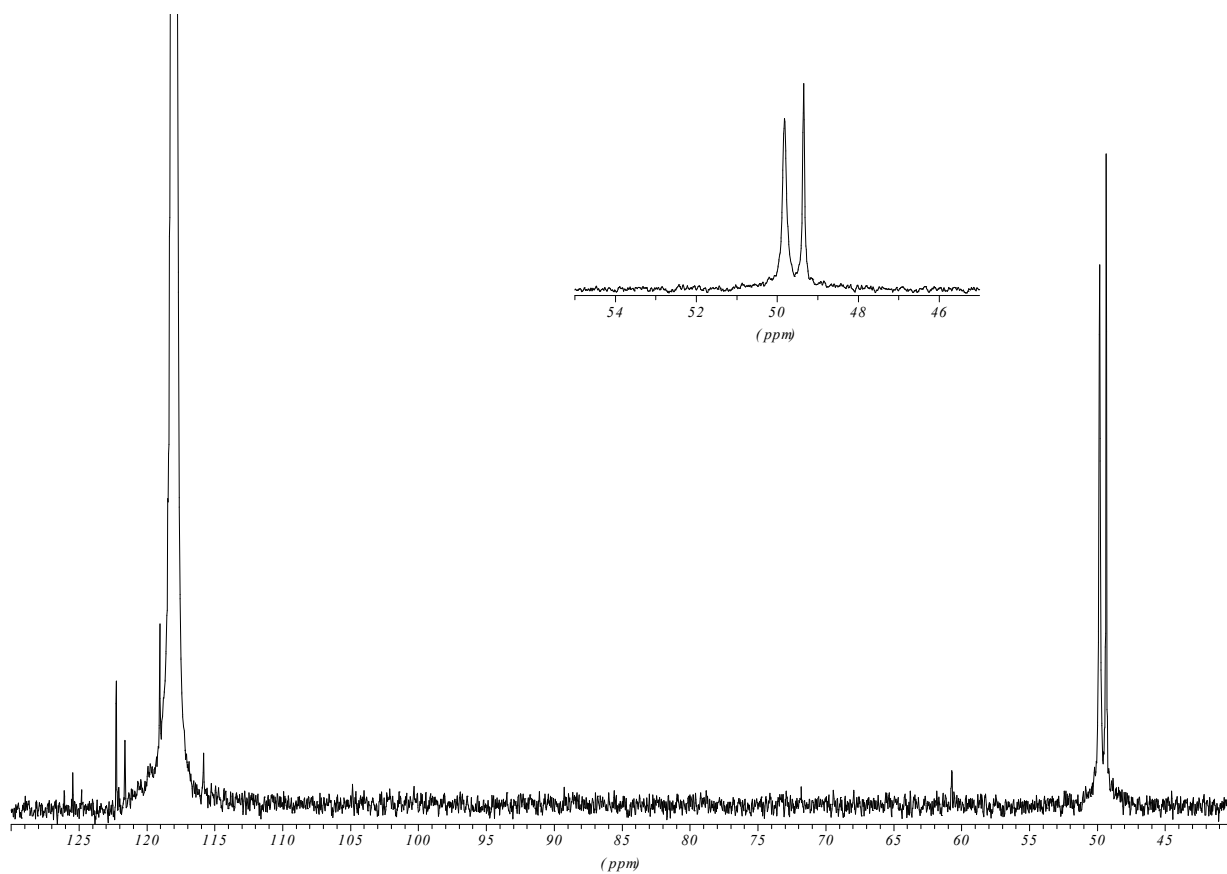

**Figure 27.**  $^{19}\text{F}$  NMR spectrum of compound 11 (400 MHz,  $\text{CD}_3\text{CN}$ ).

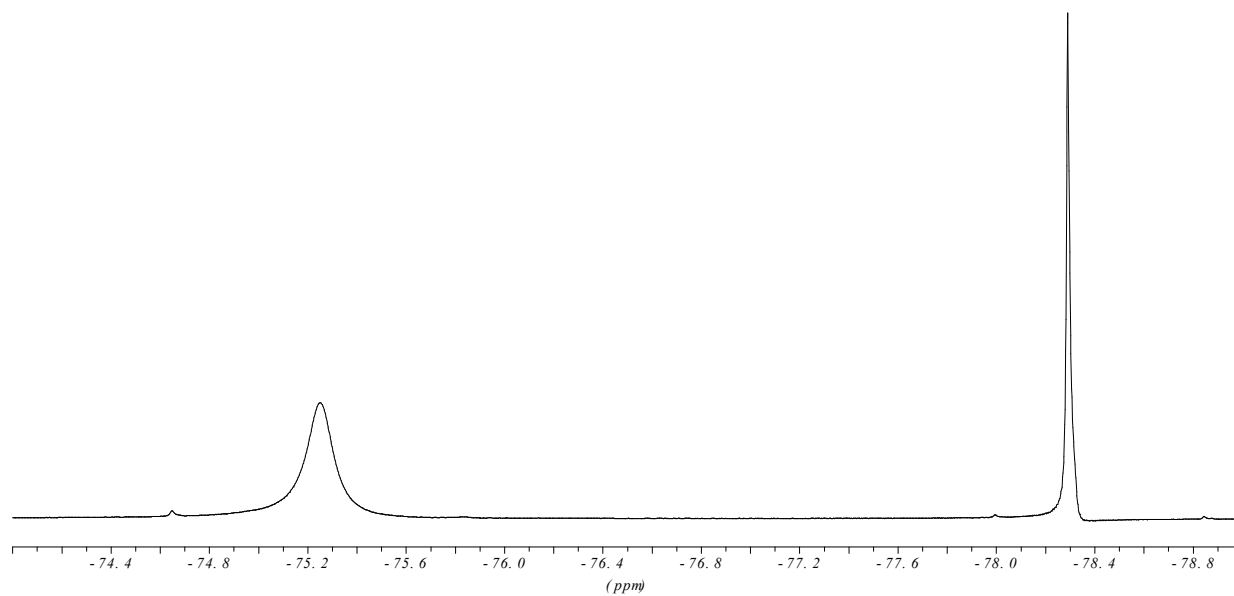

Figure 28. FT-IR spectrum of compound 11 (KBr)

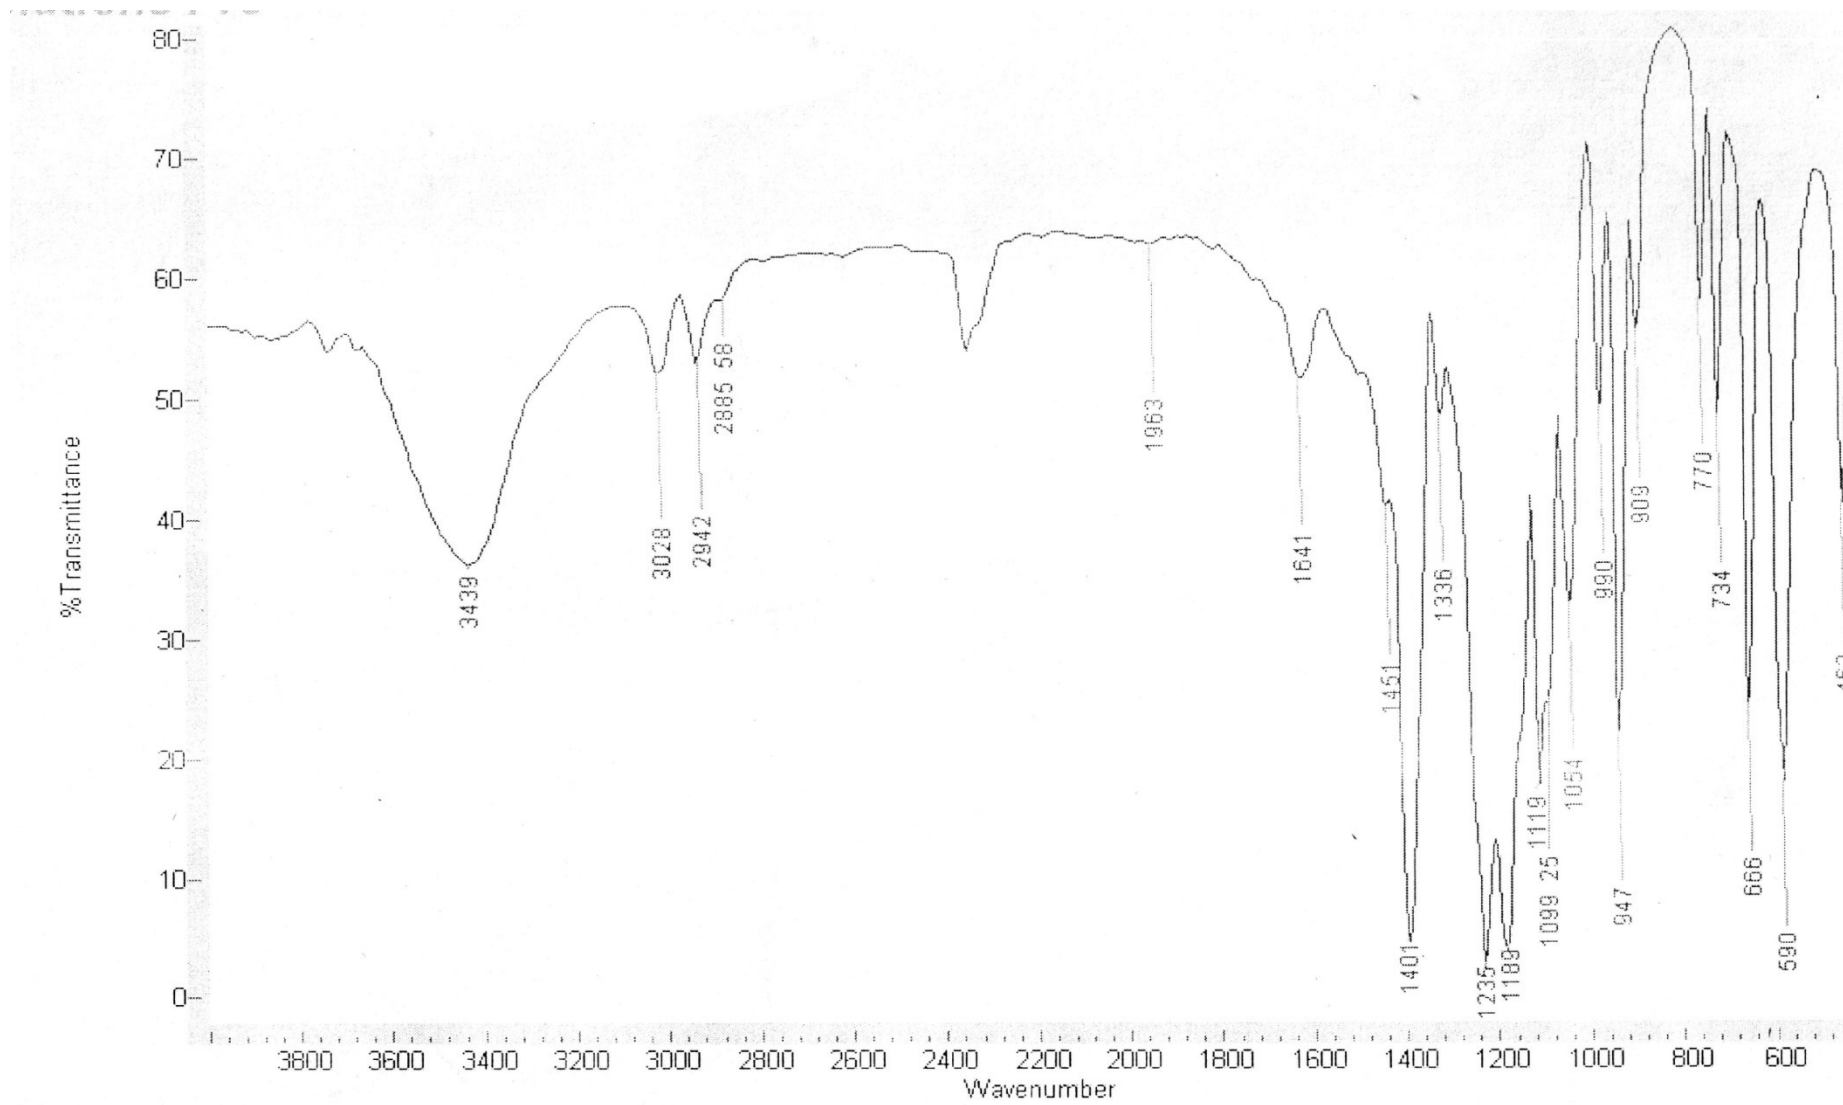

Supplement: c7ra05831d1.pdf [file c7ra05831d1.pdf]
